# Supplementary material for: Total synthesis of resolvin D3
Source: Royal Society of Chemistry journal article supplement (doi:10.1039/d2ob00750a), 2022-01-01

## Supplementary Information for

### Total Synthesis of Resolvin D3

Narihito Ogawa,<sup>\*a</sup> Kyosuke Katagiri,<sup>a</sup> Yosuke Haimoto,<sup>a</sup> Yuichi Kobayashi<sup>b</sup>

<sup>a</sup> Department of Applied Chemistry, Meiji University

1-1-1 Higashimita, Tama-ku, Kawasaki, Kanagawa 214-8571, Japan

<sup>b</sup> Organization for the Strategic Coordination of Research and Intellectual Properties, Meiji University

1-1-1 Higashimita, Tama-ku, Kawasaki, Kanagawa 214-8571, Japan

|                                |     |
|--------------------------------|-----|
| <b>Table of Contents</b>       | S1  |
| <b>Experimental Procedures</b> | S2  |
| <b>Tables S1 and S2</b>        | S16 |
| <b>References</b>              | S18 |
| <b>NMR spectra</b>             | S19 |
| <b>UV spectrum</b>             | S39 |

## Experimental Procedures

### General Information

Infrared (IR) spectra are reported in wave number ( $\text{cm}^{-1}$ ). The  $^1\text{H}$  NMR (400 MHz) and  $^{13}\text{C}$  NMR (100 MHz) spectra were recorded in  $\text{CDCl}_3$  or  $\text{CD}_3\text{OD}$  with  $\text{Me}_4\text{Si}$  ( $\delta = 0$  ppm), the centerline of  $\text{CDCl}_3$  triplet ( $\delta = 77.1$  ppm) or residual protonated solvent as an internal standard. Signal patterns are indicated as br s, broad singlet; s, singlet; d, doublet; t, triplet; q, quartet; m, multiplet. Coupling constants ( $J$ ) are given in hertz (Hz). High-resolution mass spectroscopy (HRMS) was obtained by ionizing samples *via* field desorption (FD). After the reactions were finished, the organic extracts were concentrated by using an evaporator and then the residues were purified by chromatography on silica gel (Kanto, spherical silica gel 60 N).

### 4-[(*tert*-Butyldimethylsilyl)oxy]butan-1-ol (**11**)

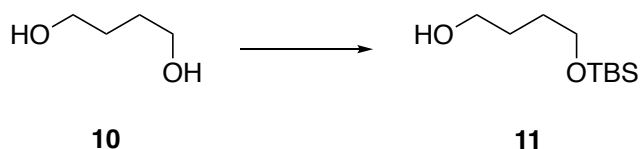

To an ice-cold solution of 1,4-butanediol (**10**) (5.30 mL, 60.0 mmol) in THF (200 mL) was added NaH (55% dispersion in mineral oil, 2.62 g, 60.0 mmol). After being stirred at room temperature for 1 h, TBSCl (9.04 g, 60.0 mmol) was added at 0 °C. The mixture was stirred at room temperature for 3 h, and diluted with  $\text{H}_2\text{O}$ . The resulting mixture was extracted with EtOAc three times. The combined extracts were dried over  $\text{MgSO}_4$  and concentrated. The residue was purified by chromatography on silica gel (hexane/EtOAc) to give silyl ether **11** (11.7 g, 96%) as a colorless liquid:  $R_f = 0.26$  (hexane/EtOAc = 3:1);  $^1\text{H}$  NMR (400 MHz,  $\text{CDCl}_3$ )  $\delta$  0.07 (s, 6 H), 0.90 (s, 9 H), 1.59–1.71 (m, 4 H), 2.71 (br s, 1 H), 3.61–3.68 (m, 2 H), 3.67 (t,  $J = 6.0$  Hz, 2 H);  $^{13}\text{C}$  NMR (100 MHz,  $\text{CDCl}_3$ )  $\delta$  -5.3, 18.4, 26.0, 30.0, 30.3, 62.8, 63.4. The spectroscopic data were consistent with the literature values.<sup>S1</sup>

### 6-[(*tert*-Butyldimethylsilyl)oxy]-1-(trimethylsilyl)hex-1-yn-3-ol (*rac*-**12**)

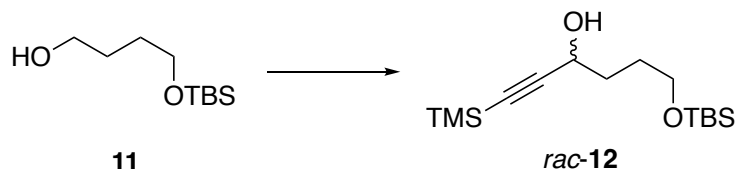

To an ice-cold solution of silyl ether **11** (4.10 g, 20.1 mmol) in  $\text{CH}_2\text{Cl}_2$  (50 mL) were added DMSO (7.10 mL, 100 mmol),  $\text{Et}_3\text{N}$  (11.2 mL, 80.4 mmol), and  $\text{SO}_3 \cdot \text{pyridine}$  (6.39 g, 40.1 mmol). The mixture was stirred at room temperature for 2 h and diluted with saturated  $\text{NH}_4\text{Cl}$ . The resulting mixture was extracted with  $\text{CH}_2\text{Cl}_2$  three times. The combined extracts were dried over

MgSO<sub>4</sub> and concentrated. The residue was passed through a short column of silica gel (hexane/EtOAc) to give the crude aldehyde, which was used for the next reaction without further purification.

To an ice-cold solution of trimethylsilylacetylene (4.15 mL, 30.0 mmol) in THF (50 mL) was added *n*-BuLi (1.59 M in hexane, 16.4 mL, 26.1 mmol). The mixture was cooled to -78 °C for 1 h, and a solution of the above aldehyde in THF (15 mL) was added to the mixture. The solution was stirred at -78 °C for 2 h and diluted with saturated NH<sub>4</sub>Cl. The resulting mixture was extracted with EtOAc three times. The combined extracts were dried over MgSO<sub>4</sub> and concentrated. The residue was purified by chromatography on silica gel (hexane/EtOAc) to give alcohol *rac*-**12** (4.92 g, 82%) as a pale yellow liquid: *R*<sub>f</sub> = 0.41 (hexane/EtOAc = 5:1); <sup>1</sup>H NMR (400 MHz, CDCl<sub>3</sub>) δ 0.08 (s, 3 H), 0.09 (s, 3 H), 0.17 (s, 9 H), 0.91 (s, 9 H), 1.62–1.74 (m, 1 H), 1.76–1.89 (m, 3 H), 3.34 (d, *J* = 6.4 Hz, 1 H), 3.62–3.75 (m, 2 H), 4.43 (dt, *J* = 6.4, 4.8 Hz, 1 H); <sup>13</sup>C NMR (100 MHz, CDCl<sub>3</sub>) δ -5.32, -5.28, 0.00, 18.4, 26.0, 28.6, 35.5, 62.5, 63.3, 89.0, 106.9. The spectroscopic data were consistent with the literature values.<sup>S2</sup>

#### 6-[(*tert*-Butyldimethylsilyl)oxy]-1-(trimethylsilyl)hex-1-yn-3-one (**13**)

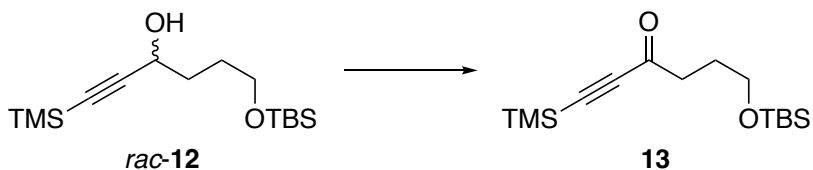

To a solution of alcohol *rac*-**12** (4.37 g, 14.6 mmol) in CH<sub>2</sub>Cl<sub>2</sub> (50 mL) were added Celite (7.06 g) and PCC (4.70 g, 21.8 mmol). After being stirred at room temperature for 14 h, the mixture was diluted with hexane and filtered through a pad of Celite. The filtrate was concentrated and the residue was purified by chromatography on silica gel (hexane/EtOAc) to give ketone **13** (3.87 g, 89%) as a colorless liquid: *R*<sub>f</sub> = 0.64 (hexane/EtOAc = 5:1); <sup>1</sup>H NMR (400 MHz, CDCl<sub>3</sub>) δ 0.05 (s, 6 H), 0.24 (s, 9 H), 0.89 (s, 9 H), 1.89 (tt, *J* = 7.2, 6.4 Hz, 2 H), 2.64 (t, *J* = 7.2 Hz, 2 H), 3.63 (t, *J* = 6.4 Hz, 2 H); <sup>13</sup>C NMR (100 MHz, CDCl<sub>3</sub>) δ -5.3, -0.7, 18.4, 26.0, 27.1, 42.0, 61.9, 97.7, 102.1, 187.9. The spectroscopic data were consistent with the literature values.<sup>S3</sup>

#### (*S*)-6-[(*tert*-Butyldimethylsilyl)oxy]-1-(trimethylsilyl)hex-1-yn-3-ol [(*S*)-**12**]

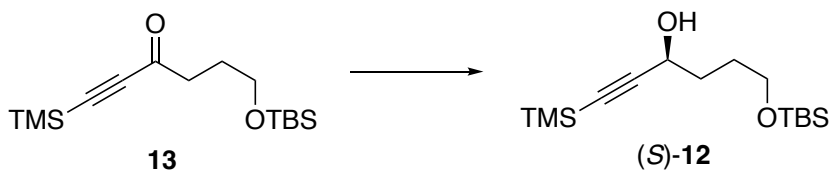

A mixture of RuCl[(*S,S*)-TsDPEN](*p*-cymene) (293 mg, 0.468 mmol) and KOH (310 mg, 5.52 mmol) in CH<sub>2</sub>Cl<sub>2</sub> (2 mL) was stirred at room temperature for 12 min and washed with H<sub>2</sub>O several

times. The CH<sub>2</sub>Cl<sub>2</sub> layer was transferred to another flask with CH<sub>2</sub>Cl<sub>2</sub>, dried over CaH<sub>2</sub>, and concentrated to afford purple solids, to which were added *i*-PrOH (8 mL) and a solution of ketone **13** (2.75 g, 9.21 mmol) in *i*-PrOH (5 mL). The mixture was stirred at room temperature for 1 h and concentrated. The residue was purified by chromatography on silica gel (hexane/EtOAc) to give alcohol (*S*)-**12** (2.63 g, 95%): 98% ee by HPLC analysis (Chiralcel OD-H, hexane, 1.0 mL/min, 35 °C, *t*<sub>R</sub>/min 13.4 (*R*-isomer, minor) and 14.0 (*S*-isomer, major); The <sup>1</sup>H and <sup>13</sup>C NMR spectroscopic data were consistent with those of the racemate.

**(*S,E*)-6-[(*tert*-Butyldimethylsilyl)oxy]-1-(trimethylsilyl)hex-1-en-3-ol (**6**)**

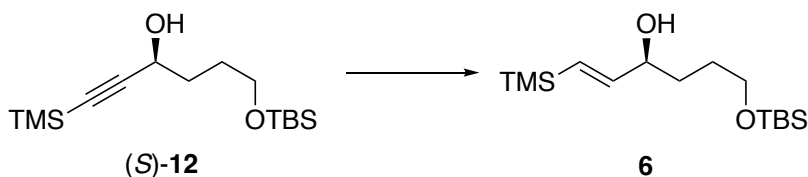

To an ice-cold solution of alcohol (*S*)-**12** (2.63 g, 8.75 mmol) in Et<sub>2</sub>O (20 mL) was added Red-Al (3.6 M in toluene, 6.00 mL, 21.6 mmol) dropwise. After being stirred at room temperature for 1.5 h, the mixture was poured into saturated Rochelle salt. The resulting mixture was extracted with EtOAc three times. The combined extracts were dried over MgSO<sub>4</sub> and concentrated. The residue was purified by chromatography on silica gel (hexane/EtOAc) to give allyl alcohol **6** (2.03 g, 77%) as a colorless liquid: *R*<sub>f</sub> = 0.41 (hexane/EtOAc = 5:1); [α]<sub>D</sub><sup>21</sup> -1.1 (*c* 1.03, CHCl<sub>3</sub>); <sup>1</sup>H NMR (400 MHz, CDCl<sub>3</sub>) δ 0.066 (s, 9 H), 0.073 (s, 6 H), 0.91 (s, 9 H), 1.53–1.74 (m, 4 H), 2.79 (d, *J* = 4.4 Hz, 1H), 3.67 (t, *J* = 5.6 Hz, 2 H), 4.08–4.16 (m, 1 H), 5.87 (dd, *J* = 18.8, 1.2 Hz, 1 H), 6.05 (dd, *J* = 18.8, 5.2 Hz, 1 H); <sup>13</sup>C NMR (100 MHz, CDCl<sub>3</sub>) δ -5.3, -1.2, 18.4, 26.0, 28.9, 34.5, 63.6, 74.2, 129.0, 148.6. The spectroscopic data were consistent with the literature values.<sup>S4</sup>

**(*S,Z*)-6-Bromo-4-[(*tert*-butyldiphenylsilyl)oxy]hex-5-en-1-ol (**15**)**

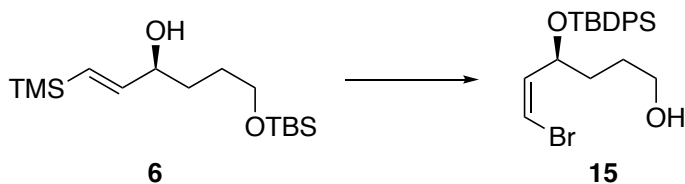

To a solution of allyl alcohol **6** (1.90 g, 6.28 mmol) in CH<sub>2</sub>Cl<sub>2</sub> (20 mL) at -78 °C was added Br<sub>2</sub> (0.35 mL, 6.8 mmol) in CH<sub>2</sub>Cl<sub>2</sub> (3 mL) dropwise. After stirring at -78 °C for 15 min, excess bromine was quenched with aqueous Na<sub>2</sub>S<sub>2</sub>O<sub>3</sub>. The resulting mixture was extracted with hexane three times. The combined extracts were dried over MgSO<sub>4</sub> and concentrated to give the crude dibromide, which was used for the next reaction without further purification.

To a solution of the above dibromide in THF (20 mL) at -78 °C was added TBAF (1.0 M in THF, 6.91 ml, 6.91 mmol) dropwise. After stirring at -78 °C for 13 min the mixture and poured



into brine. The resulting mixture was extracted with Et<sub>2</sub>O three times. The combined extracts were dried over MgSO<sub>4</sub> and concentrated. The residue was passed through a short column of silica gel (hexane/EtOAc) to give the crude (*Z*)-bromide **14**, which was used for the next reaction without further purification.

To an ice-cold solution of the above (*Z*)-bromide **14** in CH<sub>2</sub>Cl<sub>2</sub> (10 mL) were added imidazole (641 mg, 9.42 mmol) and TBDPSCI (2.10 mL, 8.10 mmol). After being stirred at room temperature for 19 h, the mixture was diluted with saturated NaHCO<sub>3</sub>. The resulting mixture was extracted with CH<sub>2</sub>Cl<sub>2</sub> three times. The combined extracts were dried over MgSO<sub>4</sub> and concentrated. The residue was passed through a short column of silica gel (hexane/EtOAc) to give the crude silyl ether, which was used for the next reaction without further purification.

To an ice-cold solution of the above silyl ether in MeOH (10 mL) was added PPTS (947 mg, 3.77 mmol). The solution was stirred at room temperature for 19 h and concentrated. The resulting mixture was diluted with saturated NaHCO<sub>3</sub> and extracted with EtOAc three times. The combined extracts were dried over MgSO<sub>4</sub> and concentrated to give a residue, which was purified by chromatography on silica gel to afford alcohol **15** (1.33 g, 49%) as a colorless liquid: *R*<sub>f</sub> = 0.17 (hexane/EtOAc = 5:1); [α]<sub>D</sub><sup>21</sup> +61 (*c* 1.02, CHCl<sub>3</sub>); IR (neat) 3333, 1428, 1110, 702 cm<sup>-1</sup>; <sup>1</sup>H NMR (400 MHz, CDCl<sub>3</sub>) δ 1.06 (s, 9 H), 1.47 (br s, 1 H), 1.52–1.70 (m, 4 H), 3.50 (dd, *J* = 10.0, 6.4 Hz, 1 H), 3.56 (dd, *J* = 10.0, 6.0 Hz, 1 H), 4.63–4.71 (m, 1 H), 6.01 (dd, *J* = 7.2 Hz, 1.2 Hz, 1 H), 6.18 (t, *J* = 7.2 Hz, 1 H), 7.33–7.47 (m, 6 H), 7.64 (dd, *J* = 7.6, 1.2 Hz, 2 H), 7.68 (dd, *J* = 7.6, 1.2 Hz, 2 H); <sup>13</sup>C NMR (100 MHz, CDCl<sub>3</sub>) δ 19.3, 27.0, 27.8, 33.3, 62.9, 71.5, 106.8, 127.6, 127.7, 129.7, 129.8, 133.76, 133.82, 135.9, 136.0, 137.6; HRMS (FD) calcd for C<sub>22</sub>H<sub>30</sub>BrO<sub>2</sub>Si [M+H]<sup>+</sup> 433.11984, found 433.12089.

#### Methyl (*S,Z*)-4-[(*tert*-butyldiphenylsilyl)oxy]-8-(trimethylsilyl)oct-5-en-7-ynoate (**17**)

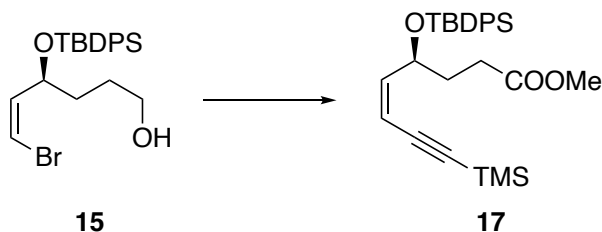

To a mixture of bromoolefin **15** (1.05 g, 2.42 mmol), Pd(PPh<sub>3</sub>)<sub>4</sub> (419 mg, 0.363 mmol), and trimethylsilylacetylene (1.00 mL, 7.23 mmol) in *t*-BuNH<sub>2</sub> (15 mL) was added CuI (92.0 mg, 0.483 mmol). The mixture was stirred at room temperature for 5 h and diluted with saturated NH<sub>4</sub>Cl. The resulting mixture was extracted with EtOAc three times. The combined extracts were dried over MgSO<sub>4</sub> and concentrated. The residue was passed through a short column of silica gel (hexane/EtOAc) to give the crude alcohol **16**, which was used for the next reaction without further purification.

To an ice-cold solution of the above alcohol **16** in CH<sub>2</sub>Cl<sub>2</sub> (16 mL) and DMSO (4 mL) were added Et<sub>3</sub>N (1.67 mL, 12.0 mmol) and SO<sub>3</sub>·pyridine (1.13 g, 7.23 mmol). The mixture was stirred at room temperature for 2 h and diluted with saturated NH<sub>4</sub>Cl. The resulting mixture was extracted with CH<sub>2</sub>Cl<sub>2</sub> three times. The combined extracts were dried over MgSO<sub>4</sub> and concentrated. The residue was passed through a short column of silica gel (hexane/EtOAc) to give the crude aldehyde, which was used for the next reaction without further purification.

To an ice-cold solution of the above aldehyde in *t*-BuOH (5 mL) and H<sub>2</sub>O (10 mL) were added 2-methyl-2-butene (1.30 mL, 12.2 mmol), NaH<sub>2</sub>PO<sub>4</sub>·2H<sub>2</sub>O (604 mg, 3.87 mmol), and NaClO<sub>2</sub> (70% purity, 1.10 g, 8.51 mmol). The mixture was stirred at room temperature for 1 h and diluted with saturated NH<sub>4</sub>Cl. The resulting mixture was extracted with EtOAc three times. The combined extracts were dried over MgSO<sub>4</sub> and concentrated. The residue was passed through a short column of silica gel (hexane/EtOAc) to give the crude carboxylic acid, which was used for the next reaction without further purification.

To an ice-cold solution of the above carboxylic acid in MeOH (5 mL) and Et<sub>2</sub>O (5 mL) was added TMSCHN<sub>2</sub> (0.60 M in hexane, 6.00 mL, 3.60 mmol) dropwise. The mixture was stirred at room temperature for 2 h and concentrated. The residue was purified by chromatography on silica gel (hexane/EtOAc) to give ester **17** (963 mg, 83%): *R*<sub>f</sub> = 0.59 (hexane/EtOAc = 5:1); [α]<sub>D</sub><sup>28</sup> +108 (*c* 0.85, CHCl<sub>3</sub>); IR (neat) 2150, 1742, 1428, 1251 cm<sup>-1</sup>; <sup>1</sup>H NMR (400 MHz, CDCl<sub>3</sub>) δ 0.06 (s, 9 H), 1.06 (s, 9 H), 1.79–1.98 (m, 2 H), 2.31 (t, *J* = 8.0 Hz, 2 H), 3.62 (s, 3 H), 4.80 (dt, *J* = 8.0, 6.0 Hz, 1 H), 5.34 (dd, *J* = 11.2, 0.8 Hz, 1 H), 5.90 (dd, *J* = 11.2, 8.0 Hz, 1 H), 7.32–7.45 (m, 6 H), 7.61–7.68 (m, 4 H); <sup>13</sup>C NMR (100 MHz, CDCl<sub>3</sub>) δ -0.2, 19.4, 27.1, 29.5, 32.7, 51.6, 71.0, 100.4, 100.8, 109.3, 127.5, 127.6, 129.6, 129.7, 133.99, 134.04, 135.9, 136.0, 146.1, 174.0; HRMS (FD) calcd for C<sub>28</sub>H<sub>38</sub>O<sub>3</sub>Si<sub>2</sub> [M]<sup>+</sup> 478.23595, found 478.23479.

#### Methyl (*S,Z*)-4-[(*tert*-butyldiphenylsilyl)oxy]oct-5-en-7-ynoate (**18**)

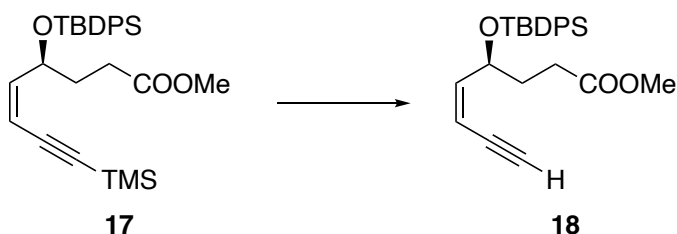

To an ice-cold solution of ester **17** (890 mg, 1.86 mmol) in MeOH (15 mL) was added K<sub>2</sub>CO<sub>3</sub> (360 mg, 2.60 mmol). The mixture was stirred at room temperature for 3 h and concentrated. The resulting mixture was diluted with saturated NH<sub>4</sub>Cl and extracted with EtOAc three times. The combined extracts were dried over MgSO<sub>4</sub> and concentrated. The residue was purified by chromatography on silica gel (hexane/EtOAc) to give acetylene **18** (696 mg, 92%) as a colorless oil: *R*<sub>f</sub> = 0.38 (hexane/EtOAc = 5:1); [α]<sub>D</sub><sup>25</sup> +105 (*c* 0.69, CHCl<sub>3</sub>); IR (neat) 3294, 1740, 1428,

1112  $\text{cm}^{-1}$ ;  $^1\text{H}$  NMR (400 MHz,  $\text{CDCl}_3$ )  $\delta$  1.05 (s, 9 H), 1.80–2.00 (m, 2 H), 2.34 (t,  $J = 8.0$  Hz, 2 H), 2.86 (dd,  $J = 2.4, 0.8$  Hz, 1 H), 3.61 (s, 3 H), 4.78 (dtd,  $J = 8.8, 6.8, 0.8$  Hz, 1 H), 5.29 (ddd,  $J = 11.2, 2.4, 0.8$  Hz, 1 H), 5.95 (ddd,  $J = 11.2, 8.8, 0.8$  Hz, 1 H), 7.32–7.45 (m, 6 H), 7.61–7.69 (m, 4 H);  $^{13}\text{C}$  NMR (100 MHz,  $\text{CDCl}_3$ )  $\delta$  19.4, 27.0, 29.5, 32.6, 51.6, 70.9, 79.2, 83.0, 108.2, 127.5, 127.6, 129.6, 129.7, 133.88, 133.94, 135.9, 136.0, 146.9, 173.9; HRMS (FD) calcd for  $\text{C}_{25}\text{H}_{30}\text{O}_3\text{Si}$   $[\text{M}]^+$  406.19642, found 406.19609.

### 3-[(*tert*-Butyldimethylsilyl)oxy]propan-1-ol (**20**)

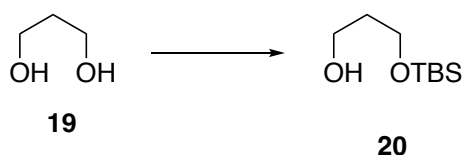

To an ice-cold solution of 1,3-propanediol (**19**) (4.35 mL, 60.0 mmol) in THF (150 mL) was added NaH (55% dispersion in mineral oil, 2.62 g, 60.0 mmol). After being stirred at room temperature for 30 min, TBSCl (9.04 g, 60.0 mmol) was added. The mixture was stirred at room temperature for 2.5 h, and diluted with  $\text{H}_2\text{O}$ . The resulting mixture was extracted with EtOAc three times. The combined extracts were dried over  $\text{MgSO}_4$  and concentrated. The residue was purified by chromatography on silica gel (hexane/EtOAc) to give silyl ether **20** (10.9 g, 95%) as a colorless liquid:  $R_f = 0.26$  (hexane/EtOAc = 5:1);  $^1\text{H}$  NMR (400 MHz,  $\text{CDCl}_3$ )  $\delta$  0.15 (s, 6 H), 0.97 (s, 9 H), 1.85 (quint,  $J = 5.2$  Hz, 2 H), 2.75 (t,  $J = 5.2$  Hz, 1 H), 3.88 (q,  $J = 5.2$  Hz, 2 H), 3.91 (t,  $J = 5.2$  Hz, 2 H);  $^{13}\text{C}$  NMR (100 MHz,  $\text{CDCl}_3$ )  $\delta$  -5.4, 18.2, 25.9, 34.2, 62.5, 63.0. The spectroscopic data were consistent with the literature values.<sup>S5</sup>

### 5-[(*tert*-Butyldimethylsilyl)oxy]-1-(trimethylsilyl)pent-1-yn-3-ol (*rac*-**21**)

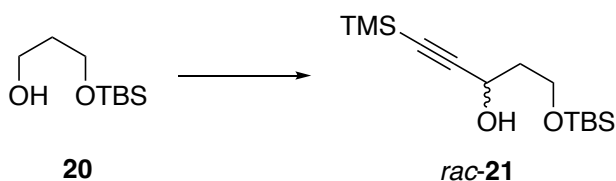

To an ice-cold solution of silyl ether **20** (10.9 g, 57.3 mmol) in  $\text{CH}_2\text{Cl}_2$  (120 mL) were added DMSO (20.2 mL, 284 mmol),  $\text{Et}_3\text{N}$  (31.8 mL, 228 mmol), and  $\text{SO}_3 \cdot \text{pyridine}$  (18.2 g, 114 mmol). The mixture was stirred at room temperature for 1 h and diluted with saturated  $\text{NH}_4\text{Cl}$ . The resulting mixture was extracted with  $\text{CH}_2\text{Cl}_2$  three times. The combined extracts were dried over  $\text{MgSO}_4$  and concentrated. The residue was passed through a short column of silica gel (hexane/EtOAc) to give the crude aldehyde, which was used for the next reaction without further purification.

To a solution of trimethylsilylacetylene (9.50 mL, 68.7 mmol) in THF (60 mL) was added *n*-

BuLi (1.64 M in hexane, 34.7 mL, 56.9 mmol) at  $-78\text{ }^{\circ}\text{C}$ . After being stirred at  $-78\text{ }^{\circ}\text{C}$  for 1 h, a solution of the above aldehyde in THF (6 mL) was added. The solution was stirred at  $-78\text{ }^{\circ}\text{C}$  for 10 h and diluted with saturated  $\text{NH}_4\text{Cl}$ . The resulting mixture was extracted with EtOAc three times. The combined extracts were dried over  $\text{MgSO}_4$  and concentrated. The residue was purified by chromatography on silica gel (hexane/EtOAc) to give alcohol *rac*-**21** (12.1 g, 74%) as a pale yellow liquid:  $R_f = 0.36$  (hexane/EtOAc = 5:1);  $^1\text{H NMR}$  (400 MHz,  $\text{CDCl}_3$ )  $\delta$  0.09 (s, 3 H), 0.10 (s, 3 H), 0.17 (s, 9 H), 0.91 (s, 9 H), 1.81–1.91 (m, 1 H), 1.96–2.06 (m, 1 H), 3.48 (d,  $J = 6.4$  Hz, 1 H), 3.81 (ddd,  $J = 10.4, 6.0, 4.4$  Hz, 1 H), 4.03 (ddd,  $J = 10.4, 8.2, 4.0$  Hz, 1 H), 4.60 (dt,  $J = 6.4, 4.0$  Hz, 1 H);  $^{13}\text{C NMR}$  (100 MHz,  $\text{CDCl}_3$ )  $\delta$   $-5.50, -5.54, -0.02, 18.3, 25.9, 38.3, 61.3, 62.5, 89.4, 106.2$ . The spectroscopic data were consistent with the literature values.<sup>S6</sup>

#### 5-[(*tert*-Butyldimethylsilyloxy)-1-(trimethylsilyl)pent-1-yn-3-one (**22**)

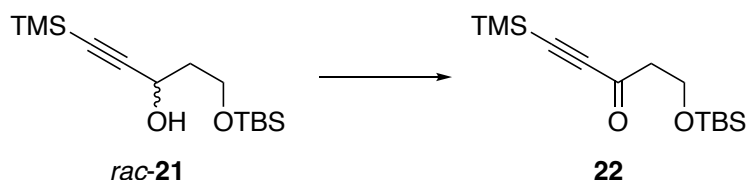

To a solution of alcohol *rac*-**21** (3.36 g, 11.7 mmol) in  $\text{CH}_2\text{Cl}_2$  (30 mL) were added Celite (5.68 g) and PCC (3.79 g, 17.6 mmol). After being stirred at room temperature for 18.5 h, the mixture was diluted with hexane and filtered through a pad of Celite. The filtrate was concentrated and the residue was purified by chromatography on silica gel (hexane/EtOAc) to give ketone **22** (2.77 g, 83%) as a colorless liquid:  $R_f = 0.65$  (hexane/EtOAc = 5:1);  $^1\text{H NMR}$  (400 MHz,  $\text{CDCl}_3$ )  $\delta$  0.06 (s, 6 H), 0.24 (s, 9 H), 0.88 (s, 9 H), 2.75 (t,  $J = 6.2$  Hz, 2 H), 3.98 (t,  $J = 6.2$  Hz, 2 H);  $^{13}\text{C NMR}$  (100 MHz,  $\text{CDCl}_3$ )  $\delta$   $-5.4, -0.7, 18.3, 25.9, 48.4, 58.6, 98.2, 102.0, 186.4$ . The spectroscopic data were consistent with the literature values.<sup>S6</sup>

#### (*R*)-5-[(*tert*-Butyldimethylsilyloxy)-1-(trimethylsilyl)pent-1-yn-3-ol [(*R*)-**21**]

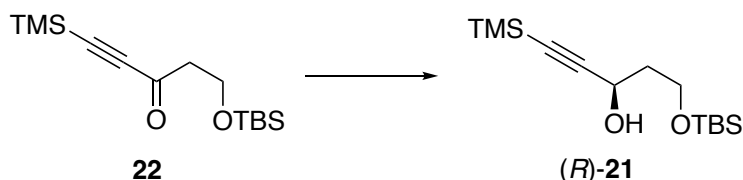

A mixture of  $\text{RuCl}[(R,R)\text{-TsDPEN}](p\text{-cymene})$  (173 mg, 0.272 mmol) and KOH (183 mg, 3.26 mmol) in  $\text{CH}_2\text{Cl}_2$  (2.0 mL) was stirred at room temperature for 10 min and washed with  $\text{H}_2\text{O}$  several times. The  $\text{CH}_2\text{Cl}_2$  layer was transferred to another flask with  $\text{CH}_2\text{Cl}_2$ , dried over  $\text{CaH}_2$ , and concentrated to afford purple solids, to which were added *i*-PrOH (8 mL) and a solution of ketone **22** (1.55 g, 5.45 mmol) in *i*-PrOH (7 mL). The mixture was stirred at room temperature for 2 h and concentrated. The residue was purified by chromatography on silica gel

(hexane/EtOAc) to give alcohol (*R*)-**21** (1.47 g, 94%): 98% ee by HPLC analysis (Chiralcel OD-H, hexane, 1.0 mL/min, 35 °C,  $t_R$ /min 8.9 (*R*-isomer, major) and 10.0 (*S*-isomer, minor)); The  $^1\text{H}$  and  $^{13}\text{C}$  NMR spectroscopic data were consistent with those of the racemate.

**(*R,E*)-3-[(*tert*-Butyldiphenylsilyl)oxy]-5-iodopent-4-en-1-ol (**24**)**

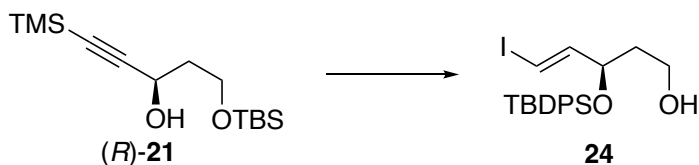

To an ice-cold solution of alcohol (*R*)-**21** (1.47 g, 5.13 mmol) in  $\text{CH}_2\text{Cl}_2$  (30 mL) were added imidazole (1.05 g, 15.4 mmol) and TBDPSCl (2.00 mL, 7.69 mmol). After being stirred at room temperature for 5 h, the mixture was diluted with saturated  $\text{NaHCO}_3$ . The resulting mixture was extracted with  $\text{CH}_2\text{Cl}_2$  three times. The combined extracts were dried over  $\text{MgSO}_4$  and concentrated. The residue was passed through a short column of silica gel (hexane/EtOAc) to give the crude silyl ether, which was used for the next reaction without further purification.

To a solution of the above silyl ether in MeOH (15 mL) was added  $\text{K}_2\text{CO}_3$  (1.07 g, 7.74 mmol). The mixture was stirred at room temperature for 3 h and concentrated. The resulting mixture was diluted with saturated  $\text{NH}_4\text{Cl}$  and extracted with EtOAc three times. The combined extracts were dried over  $\text{MgSO}_4$  and concentrated. The residue was passed through a short column of silica gel (hexane/EtOAc) to give the crude acetylene **23**, which was used for the next reaction without further purification.

To an ice-cold mixture of  $\text{Cp}_2\text{ZrCl}_2$  (3.00 g, 10.3 mmol) in THF (10 mL) was added DIBAL (1.02 M in hexane, 9.07 mL, 9.25 mmol). The mixture was stirred at 0 °C for 1 h and a solution of the above acetylene **23** in THF (5.0 mL) was added. The mixture was warmed to room temperature over 3 h and then cooled to  $-78$  °C. The solution of  $\text{I}_2$  (2.61 g, 10.3 mmol) in THF (3.0 mL) was added. The solution was stirred at room temperature for 1 h and diluted with saturated  $\text{Na}_2\text{S}_2\text{O}_3$  and saturated Rochelle salt. The resulting mixture was extracted with EtOAc three times. The combined extracts were dried over  $\text{MgSO}_4$  and concentrated. The residue was passed through a short column of silica gel (hexane/EtOAc) to give the crude olefin, which was used for the next reaction without further purification.

To an ice-cold solution of the above olefin in MeOH (13 mL) was added PPTS (1.29 g, 5.13 mmol). The mixture was stirred at room temperature for 31 h and concentrated. The resulting mixture was diluted with saturated  $\text{NaHCO}_3$  and extracted with EtOAc three times. The combined extracts were dried over  $\text{MgSO}_4$  and concentrated. The residue was purified by chromatography on silica gel (hexane/EtOAc) to give iodoolefin **24** (1.93 g, 81%) as a liquid:  $R_f = 0.20$  (hexane/EtOAc = 5:1);  $[\alpha]_D^{20} +114$  ( $c$  0.87,  $\text{CHCl}_3$ );  $^1\text{H}$  NMR (400 MHz,  $\text{CDCl}_3$ )  $\delta$  1.07 (s, 9 H),

1.63–1.82 (m, 3 H), 3.64 (sext,  $J = 5.6$  Hz, 1 H), 3.69–3.78 (m, 1 H), 4.33 (qd,  $J = 6.0, 0.8$  Hz, 1 H), 5.96 (dd,  $J = 14.8, 0.8$  Hz, 1 H), 6.49 (dd,  $J = 14.8, 6.0$  Hz, 1 H), 7.37–7.48 (m, 6 H), 7.61–7.70 (m, 4 H);  $^{13}\text{C}$  NMR (100 MHz,  $\text{CDCl}_3$ )  $\delta$  19.4, 27.1, 39.1, 59.2, 74.5, 77.7, 127.7, 127.8, 130.0, 130.1, 133.1, 133.3, 135.9, 136.0, 147.4. The spectroscopic data were consistent with the literature values.<sup>S7</sup>

**(*R,E*)-[3-[(*tert*-Butyldiphenylsilyl)oxy]-5-iodopent-4-en-1-yl]iodotriphenyl- $\lambda^5$ -phosphane**  
**(8)**

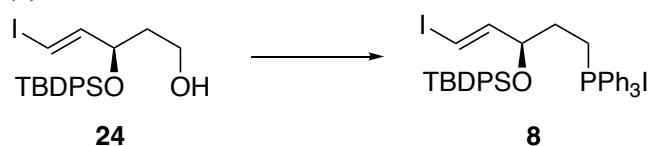

To an ice-cold solution of iodoolefin **24** (1.75 g, 3.75 mmol) in  $\text{CH}_2\text{Cl}_2$  (13 mL) were added  $\text{PPh}_3$  (1.18 g, 4.50 mmol) and imidazole (306 mg, 4.49 mmol). After being stirred at 0 °C for 15 min, iodine (1.14 g, 4.49 mmol) in  $\text{CH}_2\text{Cl}_2$  (4 mL) was added. The mixture was stirred at room temperature for 1 h, and diluted with saturated  $\text{Na}_2\text{S}_2\text{O}_3$ . The resulting mixture was extracted with  $\text{CH}_2\text{Cl}_2$  three times. The combined extracts were dried over  $\text{MgSO}_4$  and concentrated. The residue was passed through a short column of silica gel (hexane/EtOAc) to give the crude iodide, which was used for the next reaction without further purification.

To a solution of the above iodide in MeCN (25 mL) was added  $\text{PPh}_3$  (1.52 g, 5.80 mmol). The solution was stirred at 80 °C for 48 h and concentrated. The residue was purified by chromatography on silica gel ( $\text{CH}_2\text{Cl}_2$  then 5% MeOH) to give the phosphonium salt **8** (3.15 g, quant.) as a yellow solids:  $R_f = 0.64$  ( $\text{CH}_2\text{Cl}_2/\text{MeOH} = 10:1$ ); mp 79–80 °C;  $[\alpha]_{\text{D}}^{23} +31$  ( $c$  1.00,  $\text{CHCl}_3$ ); IR (neat) 1438, 1112, 941  $\text{cm}^{-1}$ ;  $^1\text{H}$  NMR (400 MHz,  $\text{CDCl}_3$ )  $\delta$  1.0 (s, 9 H), 1.65–1.91 (m, 2 H), 3.15–3.27 (m, 1 H), 3.53–3.66 (m, 1 H), 4.77 (dt,  $J = 6.4, 4.4$  Hz, 1 H), 6.33 (d,  $J = 14.4$  Hz, 1 H), 6.50 (dd,  $J = 14.4, 6.4$  Hz, 1 H), 7.31–7.49 (m, 5 H), 7.54–7.71 (m, 17 H), 7.77–7.85 (m, 3 H);  $^{13}\text{C}$  NMR (100 MHz,  $\text{CDCl}_3$ )  $\delta$  18.7 (d,  $J = 53$  Hz), 19.5, 27.1, 30.1 (d,  $J = 4$  Hz), 74.8 (d,  $J = 16$  Hz), 80.3, 117.7 (d,  $J = 86$  Hz), 128.0, 128.1, 130.11, 130.15, 130.7 (d,  $J = 13$  Hz), 132.9, 133.5, 133.6 (d,  $J = 10$  Hz), 135.3 (d,  $J = 3$  Hz), 135.6, 135.9, 146.1; HRMS signals were not detected by FD-MS.

**(S)-5-[(*tert*-Butyldimethylsilyloxy)-1-(trimethylsilyl)pent-1-yn-3-ol [(S)-21]**

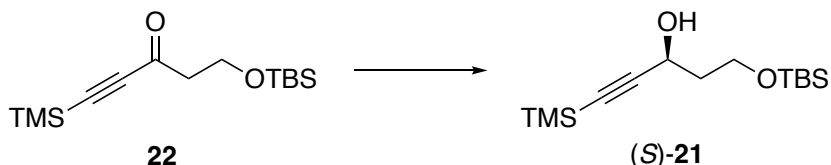

A mixture of RuCl[(*S,S*)-TsDPEN](*p*-cymene) (223 mg, 0.351 mmol) and KOH (236 mg, 4.21 mmol) in CH<sub>2</sub>Cl<sub>2</sub> (2 mL) was stirred at room temperature for 15 min and washed with H<sub>2</sub>O several times. The CH<sub>2</sub>Cl<sub>2</sub> layer was transferred to another flask with CH<sub>2</sub>Cl<sub>2</sub>, dried over CaH<sub>2</sub>, and concentrated to afford purple solids, to which were added *i*-PrOH (8 mL) and a solution of ketone **22** (1.99 g, 6.99 mmol) in *i*-PrOH (7 mL). The mixture was stirred at room temperature for 1 h and concentrated. The residue was purified by chromatography on silica gel (hexane/EtOAc) to give alcohol **(S)-21** (1.87 g, 93%): 99% ee by HPLC analysis (Chiralcel OD-H, hexane, 1.0 mL/min, 35 °C, *t<sub>R</sub>*/min 9.1 (*R*-isomer, minor) and 9.7 (*S*-isomer, major)). The spectroscopic data were consistent with the literature values.<sup>S6</sup>

**(*S,E*)-2,2,9,9,10,10-Hexamethyl-3,3-diphenyl-5-[2-(trimethylsilyl)vinyl]-4,8-dioxa-3,9-disilaundecane (**26**)**

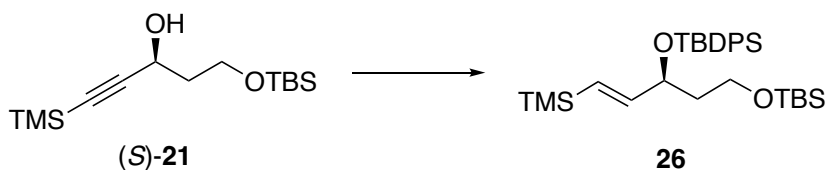

To an ice-cold solution of alcohol **(S)-21** (1.87 g, 6.53 mmol) in Et<sub>2</sub>O (25 mL) was added Red-Al (3.6 M in toluene, 5.40 mL, 19.4 mmol) dropwise. After being stirred at room temperature for 2 h, the mixture was poured into saturated Rochelle salt at 0 °C. The resulting mixture was extracted with EtOAc three times. The combined extracts were dried over MgSO<sub>4</sub> and concentrated. The residue was passed through a short column of silica gel (hexane/EtOAc) to give the crude diol **25**, which was used for the next reaction without further purification.

To an ice-cold solution of the above diol **25** in CH<sub>2</sub>Cl<sub>2</sub> (30 mL) were added imidazole (420 mg, 6.17 mmol) and TBSCl (787 mg, 5.22 mmol). After being stirred at 0 °C for 1 h, the mixture was diluted with saturated NaHCO<sub>3</sub> and H<sub>2</sub>O at 0 °C and was extracted with CH<sub>2</sub>Cl<sub>2</sub> three times. The combined extracts were dried over MgSO<sub>4</sub>, and concentrated. The residue was passed through a short column of silica gel (hexane/EtOAc) to give the crude allyl alcohol, which was used for the next reaction without further purification.

To an ice-cold solution of the above allyl alcohol in CH<sub>2</sub>Cl<sub>2</sub> (20 mL) were added imidazole (970 mg, 14.2 mmol) and TBDPSCI (1.85 mL, 7.13 mmol). After being stirred at room temperature for 6 h, the solution was diluted with saturated NaHCO<sub>3</sub>, and the mixture was

extracted with CH<sub>2</sub>Cl<sub>2</sub> three times. The combined extracts were dried over MgSO<sub>4</sub> and concentrated. The residue was purified by chromatography on silica gel to give silyl ether **26** (2.23 g, 65%) as a colorless liquid: *R*<sub>f</sub> = 0.68 (hexane/EtOAc = 5:1); [α]<sub>D</sub><sup>24</sup> -23 (*c* 0.98, CHCl<sub>3</sub>); IR (neat) 1249, 1111, 837 cm<sup>-1</sup>; <sup>1</sup>H NMR (400 MHz, CDCl<sub>3</sub>) δ 0.09 (s, 9 H), 0.126 (s, 3 H), 0.129 (s, 3 H), 0.99 (s, 9 H), 1.20 (s, 9H), 1.82 (sext, *J* = 6.4 Hz, 1H), 1.99 (sext, *J* = 6.4 Hz, 1H), 3.68–3.81 (m, 2 H), 4.40 (qd, *J* = 6.4, 0.8 Hz 1 H), 5.61 (dd, *J* = 18.8 Hz, 0.8 Hz, 1 H), 6.05 (dd, *J* = 18.8 Hz, 6.4 Hz, 1 H), 7.45–7.59 (m, 6 H), 7.76–7.84 (m, 4 H); <sup>13</sup>C NMR (100 MHz, CDCl<sub>3</sub>) δ -5.3, -5.2, -1.4, 18.3, 19.4, 26.0, 27.1, 40.7, 59.7, 74.3, 127.3, 127.5, 129.4, 129.6, 129.8, 134.3, 134.5, 136.0, 136.1, 148.1; HRMS (FD) calcd for C<sub>30</sub>H<sub>50</sub>O<sub>2</sub>Si<sub>3</sub> [M]<sup>+</sup> 526.31186, found 526.31041.

**(*S,E*)-6-[(*tert*-Butyldimethylsilyl)oxy]-4-[(*tert*-butyldiphenylsilyl)oxy]hex-2-enenitrile (**27**)**

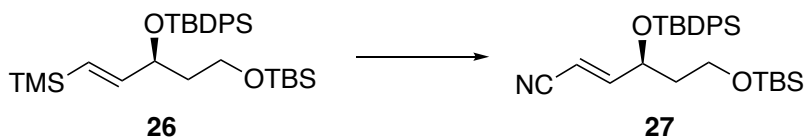

To an ice-cold solution of silyl ether **26** (2.10 g, 3.98 mmol) in CH<sub>2</sub>Cl<sub>2</sub> (30 mL) was added *m*-CPBA (65% purity, 2.11 g, 7.94 mmol) portionwise. The mixture was stirred at room temperature for 24 h, and Me<sub>2</sub>S (0.50 mL, 6.8 mmol) was added slowly at 0 °C. The mixture was stirred at room temperature for 15 min, diluted with saturated NaHCO<sub>3</sub>, and extracted with CH<sub>2</sub>Cl<sub>2</sub> three times. The combined extracts were dried over MgSO<sub>4</sub>, and concentrated. The residue was passed through a short column of silica gel (hexane/EtOAc) to give the crude epoxide, which was used for the next reaction without further purification.

To an ice-cold solution of the above epoxide in toluene (15 mL) was added Et<sub>2</sub>AlCN (0.71 M in toluene, 11.2 mL, 7.95 mmol) dropwise. After being stirred at room temperature for 2 h, the solution was poured into saturated Rochelle salt at 0 °C. The resulting mixture was stirred at room temperature for 15 h, and extracted with EtOAc three times. The combined extracts were dried over MgSO<sub>4</sub> and concentrated. The residue was purified by chromatography on silica gel to give cyanoolefin **27** (1.47 g, 77%) as a colorless liquid: *R*<sub>f</sub> = 0.40 (hexane/EtOAc = 10:1); [α]<sub>D</sub><sup>20</sup> -26 (*c* 1.01, CHCl<sub>3</sub>); IR (neat) 2224, 1112, 836 cm<sup>-1</sup>; <sup>1</sup>H NMR (400 MHz, CDCl<sub>3</sub>) δ -0.04 (s, 3 H), -0.03 (s, 3 H), 0.82 (s, 9 H), 1.08 (s, 9 H), 1.58–1.68 (m, 1 H), 1.73–1.83 (m, 1 H), 3.56 (t, *J* = 6.0 Hz, 2 H), 4.45–4.52 (m, 1 H), 5.46 (dd, *J* = 16.4 Hz, 1.6 Hz, 1 H), 6.72 (dd, *J* = 16.4 Hz, 5.2 Hz, 1 H), 7.35–7.48 (m, 6 H), 7.57–7.66 (m, 4 H); <sup>13</sup>C NMR (100 MHz, CDCl<sub>3</sub>) δ -5.4, 18.2, 19.4, 25.9, 27.0, 39.9, 58.6, 70.8, 98.3, 117.5, 127.85, 127.89, 130.0, 130.2, 133.0, 133.2, 135.7, 135.9, 156.8; HRMS (FD) calcd for C<sub>28</sub>H<sub>42</sub>NO<sub>2</sub>Si<sub>2</sub> [M+H]<sup>+</sup> 480.27541, found 480.27584.



**(3*S*,4*E*,6*Z*,9*R*,10*E*)-3,9-Bis[(*tert*-butyldiphenylsilyl)oxy]-11-iodoundeca-4,6,10-trien-1-ol**  
**(33)**

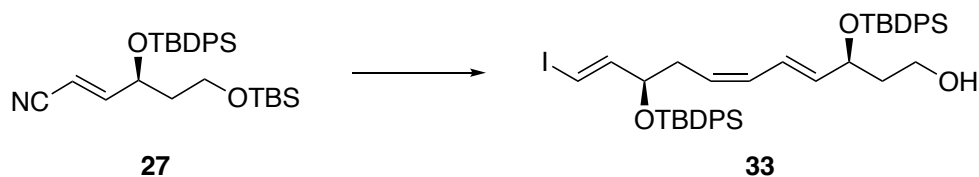

To a solution of cyanoolefin **27** (1.02 g, 2.13 mmol) in toluene (18 mL) at  $-78\text{ }^{\circ}\text{C}$  was added DIBAL (1.02 M in hexane, 2.49 mL, 2.54 mmol) dropwise. After being stirred at  $-78\text{ }^{\circ}\text{C}$  for 3 h, the mixture was poured into saturated Rochelle salt at  $0\text{ }^{\circ}\text{C}$ . The resulting mixture was extracted with EtOAc three times. The combined extracts were dried over  $\text{MgSO}_4$  and concentrated. The residue was passed through a short column of silica gel (hexane/EtOAc) to give the crude aldehyde **9**, which was used for the next reaction without further purification.

To an ice-cold mixture of phosphonium salt **8** (2.85 g, 3.40 mmol) in THF (15 mL) was added NaHMDS (1.0 M in THF, 3.0 mL, 3.0 mmol). The resulting reddish-orange mixture was stirred at  $0\text{ }^{\circ}\text{C}$  for 1 h and cooled to  $-78\text{ }^{\circ}\text{C}$ . A solution of the above aldehyde **9** in THF (6 mL) was added to the mixture dropwise. After 1 h, the mixture was warmed to  $0\text{ }^{\circ}\text{C}$  over 1 h and added saturated  $\text{NH}_4\text{Cl}$ . The resulting mixture was extracted with EtOAc three times. The combined extracts were dried over  $\text{MgSO}_4$  and concentrated. The residue was passed through a short column of silica gel (hexane/EtOAc) to give the crude olefin **32**, which was used for the next reaction without further purification.

To an ice-cold solution of the above olefin **32** in  $\text{CH}_2\text{Cl}_2$  (2 mL) and MeOH (8 mL) was added PPTS (532 mg, 2.12 mmol). The solution was stirred at room temperature for 15 h and concentrated. The resulting mixture was diluted with saturated  $\text{NaHCO}_3$  and extracted with  $\text{Et}_2\text{O}$  three times. The combined extracts were dried over  $\text{MgSO}_4$  and concentrated to give a residue, which was purified by chromatography on silica gel to afford alcohol **33** (1.41 g, 83%) as a colorless liquid:  $R_f = 0.20$  (hexane/EtOAc = 10:1);  $[\alpha]_D^{22} -2.3$  ( $c$  0.76,  $\text{CHCl}_3$ ); IR (neat) 3385, 1428, 1112  $\text{cm}^{-1}$ ;  $^1\text{H}$  NMR (400 MHz,  $\text{CDCl}_3$ )  $\delta$  1.05 (s, 9 H), 1.06 (s, 9 H), 1.66–1.76 (m, 1 H), 1.78–1.88 (m, 1 H), 1.96 (br s, 1 H), 2.09–2.22 (m, 2 H), 3.60–3.70 (m, 1 H), 3.71–3.82 (m, 1 H), 4.07 (q,  $J = 6.8$  Hz, 1 H), 4.41 (q,  $J = 6.4$  Hz, 1 H), 5.22 (dt,  $J = 9.6, 7.2$  Hz, 1 H), 5.58 (dd,  $J = 14.4, 7.2$  Hz, 1 H), 5.79–5.90 (m, 2 H), 5.95 (dd,  $J = 14.4, 0.8$  Hz, 1 H), 6.39 (dd,  $J = 14.4, 6.4$  Hz, 1 H), 7.28–7.45 (m, 12 H), 7.57–7.71 (m, 8 H);  $^{13}\text{C}$  NMR (100 MHz,  $\text{CDCl}_3$ )  $\delta$  19.3, 19.4, 27.0, 27.1, 35.5, 39.8, 59.8, 73.2, 75.4, 77.2, 125.6, 126.1, 127.5, 127.7, 129.8, 129.86, 129.89, 130.0, 133.4, 133.6, 133.7, 133.8, 135.7, 135.91, 135.95, 136.1, 147.6; HRMS (FD) calcd for  $\text{C}_{43}\text{H}_{53}\text{IO}_3\text{Si}_2$   $[\text{M}]^+$  800.25779, found 800.25558.

**(1E,3R,5Z,7E,9S,11Z)-1-Iodotetradeca-1,5,7,11-tetraene-3,9-diol (7)**

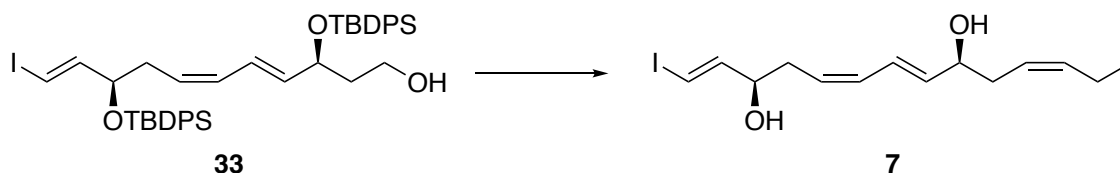

To an ice-cold solution of alcohol **33** (1.07 g, 1.34 mmol) in CH<sub>2</sub>Cl<sub>2</sub> (7 mL) and DMSO (7 mL) were added Et<sub>3</sub>N (0.93 mL, 6.7 mmol), and SO<sub>3</sub>·pyridine (638 mg, 4.01 mmol). The mixture was stirred at room temperature for 2.5 h and diluted with saturated NaHCO<sub>3</sub>. The resulting mixture was extracted with CH<sub>2</sub>Cl<sub>2</sub> three times. The combined extracts were dried over MgSO<sub>4</sub> and concentrated. The residue was passed through a short column of silica gel (hexane/EtOAc) to give the crude aldehyde, which was used for the next reaction without further purification.

To an ice-cold solution of *n*-propyltriphenylphosphonium bromide (922 mg, 2.39 mmol) in THF (6.7 mL) and HMPA (1.3 mL) was added NaHMDS (1.0 M in THF, 2.0 mL, 2.0 mmol). The resulting mixture was stirred at 0 °C for 40 min and cooled to -90 °C. After being stirred at -90 °C for 20 min, a solution of the above aldehyde in THF (3.3 mL) and HMPA (0.7 mL) was added to the mixture dropwise. After being stirred at -90 °C for 45 min, the mixture was warmed to 0 °C over 1 h and diluted saturated with NH<sub>4</sub>Cl. The resulting mixture was extracted with EtOAc three times. The combined extracts were dried over MgSO<sub>4</sub> and concentrated. The residue was passed through a short column of silica gel (hexane/EtOAc) to give the crude disilyl ether, which was used for the next reaction without further purification.

To an ice-cold solution of the above disilyl ether in THF (5 mL) was added TBAF (1.0 M in THF, 8.0 mL, 8.0 mmol). The solution was stirred at 35 °C for 22 h and diluted with saturated NH<sub>4</sub>Cl. The resulting mixture was extracted with EtOAc three times. The combined extracts were dried over MgSO<sub>4</sub> and concentrated. The residue was purified by chromatography on silica gel (hexane/EtOAc) to give diol **7** (383 mg, 82%) as a pale yellow liquid: *R*<sub>f</sub> = 0.11 (hexane/EtOAc = 3:1); [α]<sub>D</sub><sup>20</sup> +39 (*c* 0.60, CHCl<sub>3</sub>); IR (neat) 3354, 1414, 949 cm<sup>-1</sup>; <sup>1</sup>H NMR (400 MHz, CDCl<sub>3</sub>) δ 0.97 (t, *J* = 7.2 Hz, 3 H), 1.76 (s, 1 H), 1.83 (d, *J* = 3.6 Hz, 1 H), 2.07 (d of quint, *J* = 7.2, 1.2 Hz, 2 H), 2.27–2.42 (m, 2 H), 2.41–2.2.53 (m, 2 H), 4.13–4.21 (m, 1 H), 4.23 (q, *J* = 6.4 Hz, 1 H), 5.31–5.40 (m, 1 H), 5.44 (dt, *J* = 10.8, 8.0 Hz, 1 H), 5.54–5.63 (m, 1 H), 5.78 (dd, *J* = 14.8, 6.0 Hz, 1 H), 6.18 (t, *J* = 10.8 Hz, 1 H), 6.40 (dd, *J* = 14.8, 1.6 Hz, 1 H), 6.50 (ddt, *J* = 15.2, 10.8, 1.2 Hz, 1 H), 6.60 (dd, *J* = 14.8, 6.0 Hz, 1 H); <sup>13</sup>C NMR (100 MHz, CDCl<sub>3</sub>) δ 14.3, 20.9, 35.1, 35.3, 72.0, 73.9, 77.8, 123.6, 125.1, 125.8, 131.7, 135.6, 137.1, 147.6; HRMS (FD) calcd for C<sub>14</sub>H<sub>21</sub>IO<sub>2</sub> [M]<sup>+</sup> 348.05862, found 348.05876.

### Resolvin D3 (1)

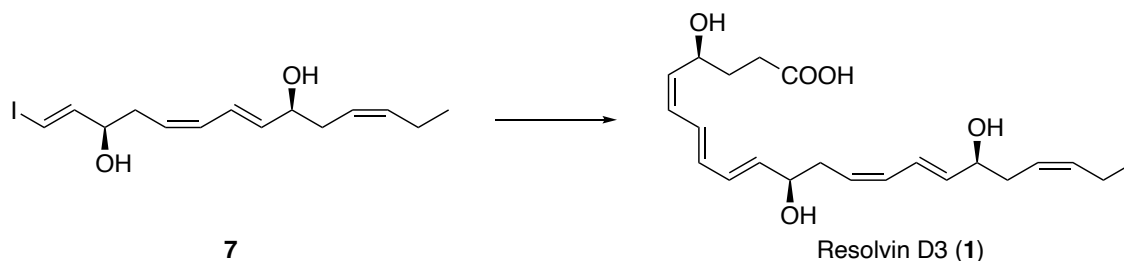

To an ice-cold solution of acetylene **18** (79.3 mg, 0.195 mmol) in THF (3 mL) was added dropwise freshly prepared  $\text{Si}_2\text{BH}$  (1.2 mL, 0.50 M in THF, 0.60 mmol). After being stirred at 0 °C for 50 min, and aqueous 2 N LiOH (5.25 mL, 10.5 mmol) and a solution of iodoolefin **7** (52.2 mg, 0.150 mmol) in THF (2 mL) were added. Argon was bubbled into the reaction mixture for 10 min and  $\text{Pd}(\text{PPh}_3)_4$  (34.7 mg, 0.0300 mmol) was added. After being stirred at 35 °C for 21 h, the mixture was diluted with saturated  $\text{NH}_4\text{Cl}$  at 0 °C. The resulting mixture was extracted with  $\text{Et}_2\text{O}$  three times. The combined extracts were dried over  $\text{MgSO}_4$  and concentrated. The residue was passed through a short column of silica gel (hexane/ $\text{EtOAc}$ ) to give the crude triene, which was used for the next reaction without further purification.

To an ice-cold solution of the above triene in THF (1.5 mL) was added TBAF (1.5 mL, 1.5 mmol). After being stirred at 35 °C for 7 h, the mixture was diluted with McIlvaine's phosphate buffer (pH 5.0) and extracted with a mixture of  $\text{CH}_2\text{Cl}_2$  and THF (small volume) five times. The combined extracts were dried over  $\text{MgSO}_4$  and concentrated to give a residue, which was purified by chromatography on silica gel to afford resolvin D3 (**1**) (27.1 mg, 48%) as a colorless liquid:  $R_f = 0.46$  ( $\text{CHCl}_3/\text{MeOH} = 5:1$ );  $[\alpha]_D^{22} +9$  ( $c$  0.40, MeOH), [lit.<sup>S8</sup> +7.9 ( $c$  0.34, MeOH)]; UV (MeOH)  $\lambda_{\text{max}}$  237, 262, 271, 282 nm; IR (neat) 3382, 1726, 1470  $\text{cm}^{-1}$ ;  $^1\text{H}$  NMR (400 MHz,  $\text{CD}_3\text{OD}$ )  $\delta$  0.96 (t,  $J = 7.5$  Hz, 3 H), 1.67–1.79 (m, 1 H), 1.79–1.90 (m, 1 H), 2.06 (quint,  $J = 7.5$  Hz, 2 H), 2.21–2.37 (m, 2 H), 2.35 (t,  $J = 7.2$  Hz, 2 H), 2.41 (dt,  $J = 14.0, 6.8$  Hz, 1 H), 2.46 (dt,  $J = 14.0, 6.8$  Hz, 1 H), 4.12 (q,  $J = 6.8$  Hz, 1 H), 4.16 (q,  $J = 6.8$  Hz, 1 H), 4.61 (dt,  $J = 10.8, 7.2$  Hz, 1 H), 5.31–5.52 (m, 4 H), 5.68 (dd,  $J = 15.2, 6.8$  Hz, 1 H), 5.75 (dd,  $J = 14.4, 6.8$  Hz, 1 H), 6.07 (t,  $J = 10.8$  Hz, 1 H), 6.09 (t,  $J = 10.8$  Hz, 1 H), 6.25 (dd,  $J = 14.4, 11.2$  Hz, 1 H), 6.31 (dd,  $J = 14.4, 10.8$  Hz, 1 H), 6.50 (dd,  $J = 15.2, 11.2$  Hz, 1 H), 6.55 (dd,  $J = 14.4, 10.8$  Hz, 1 H);  $^{13}\text{C}$  NMR (100 MHz,  $\text{CD}_3\text{OD}$ )  $\delta$  14.6, 21.7, 31.0, 33.7, 36.2, 36.7, 67.8, 73.0, 73.2, 125.5, 126.6, 128.1, 128.8, 130.8, 131.1, 131.5, 134.6, 134.8, 135.2, 137.5, 137.9, 177.5; HRMS (FD) calcd for  $\text{C}_{22}\text{H}_{32}\text{O}_5$   $[\text{M}]^+$  376.22497 found 376.22592.

**Table S1** Comparison of  $^1\text{H}$  NMR data between our synthetic reoslvlin D3 and the reported data

| NO. | synthetic<br>Resolvin D3 (1)<br>(400 MHz, $\text{CD}_3\text{OD}$ ) | Petasis's<br>Resolvin D3 (1)<br>(600 MHz, $\text{CD}_3\text{OD}$ ) <sup>S8</sup> | Anderson's<br>Resolvin D3 (1)<br>(500 MHz, $\text{CD}_3\text{OD}$ ) <sup>S9</sup> |
|-----|--------------------------------------------------------------------|----------------------------------------------------------------------------------|-----------------------------------------------------------------------------------|
| 1   | 0.96, t (7.5 Hz)                                                   | 0.98, t (7.5 Hz)                                                                 | 0.96, t (7.5 Hz)                                                                  |
| 2   | 1.67–1.79, m                                                       | 1.71–1.82, m                                                                     | 1.67–1.76, m                                                                      |
| 3   | 1.79–1.90, m                                                       | 1.88, dd (14.1, 7.2 Hz)                                                          | 1.84, dq (14.6, 7.5 Hz)                                                           |
| 4   | 2.06, quint (7.5 Hz)                                               | 2.07, q (7.3 Hz)                                                                 | 1.99–2.13, m                                                                      |
| 5   | 2.21–2.37, m                                                       | 2.22–2.38, m                                                                     |                                                                                   |
| 6   | 2.35, t (7.2 Hz)                                                   |                                                                                  | 2.16–2.59, m                                                                      |
| 7   | 2.41, dt (14.0, 6.8 Hz)                                            | 2.45, q (7.9 Hz)                                                                 |                                                                                   |
| 8   | 2.46, dt (14.0, 6.8 Hz)                                            |                                                                                  |                                                                                   |
| 9   | 4.12, q (6.8 Hz)                                                   | 4.08–4.23, m                                                                     | 4.06–4.26, m                                                                      |
| 10  | 4.16, q (6.8 Hz)                                                   |                                                                                  |                                                                                   |
| 11  | 4.61, dt (10.8, 7.2 Hz)                                            | 4.60, m                                                                          | 4.52–4.69, m                                                                      |
| 12  | 5.31–5.52, m                                                       | 5.31–5.55, m                                                                     | 5.30–5.41, m                                                                      |
|     |                                                                    |                                                                                  | 5.46, ddt (10.6, 8.7, 7.3 Hz)                                                     |
| 13  | 5.68, dd (15.2, 6.8 Hz)                                            | 5.70, dd (15.4, 6.5 Hz)                                                          | 5.68, dd (15.2, 6.5 Hz)                                                           |
| 14  | 5.75, dd (14.4, 6.8 Hz)                                            | 5.75, dd (15.2, 6.7 Hz)                                                          | 5.76, dd (14.4, 6.5 Hz)                                                           |
| 15  | 6.07, t (10.8 Hz)                                                  | 6.02–6.13, m                                                                     | 6.08, q (11.3 Hz)                                                                 |
| 16  | 6.09, t (10.8 Hz)                                                  |                                                                                  |                                                                                   |
| 17  | 6.25, dd (14.4, 11.2 Hz)                                           | 6.24, dd (14.6, 10.7 Hz)                                                         | 6.20–6.36, m                                                                      |
| 18  | 6.31, dd (14.4, 10.8 Hz)                                           | 6.34, dd (14.9, 10.8 Hz)                                                         |                                                                                   |
| 19  | 6.50, dd (15.2, 11.2 Hz)                                           | 6.52, dd (15.4, 11.1 Hz)                                                         | 6.60–6.44, m                                                                      |
| 20  | 6.55, dd (14.4, 10.8 Hz)                                           | 6.60, dd (14.6, 11.5 Hz)                                                         |                                                                                   |

**Table S2** Comparison of  $^{13}\text{C}$  NMR data between our synthetic reoslvin D3 and the reported data

| NO. | synthetic<br>Resolvin D3 (1)<br>(100 MHz, $\text{CD}_3\text{OD}$ ) | Petasis's<br>Resolvin D3 (1)<br>(150 MHz, $\text{CD}_3\text{OD}$ ) <sup>S8</sup> | Anderson's<br>Resolvin D3 (1)<br>(126 MHz, $\text{CD}_3\text{OD}$ ) <sup>S9</sup> |
|-----|--------------------------------------------------------------------|----------------------------------------------------------------------------------|-----------------------------------------------------------------------------------|
| 1   | 14.6                                                               | 14.5                                                                             | 14.6                                                                              |
| 2   | 21.7                                                               | 21.7                                                                             | 21.7                                                                              |
| 3   | 31.0                                                               | 35.3                                                                             | 30.9                                                                              |
| 4   | 33.7                                                               | 35.4                                                                             | 33.7                                                                              |
| 5   | 36.2                                                               | 36.2                                                                             | 36.2                                                                              |
| 6   | 36.7                                                               | 36.7                                                                             | 36.7                                                                              |
| 7   | 67.8                                                               | 68.9                                                                             | 67.7                                                                              |
| 8   | 73.0                                                               | 73.1                                                                             | 73.0                                                                              |
| 9   | 73.2                                                               | 73.2                                                                             | 73.2                                                                              |
| 10  | 125.5                                                              | 125.5                                                                            | 125.5                                                                             |
| 11  | 126.6                                                              | 126.6                                                                            | 126.6                                                                             |
| 12  | 128.1                                                              | 128.2                                                                            | 128.1                                                                             |
| 13  | 128.8                                                              | 129.1                                                                            | 128.7                                                                             |
| 14  | 130.8                                                              | 130.3                                                                            | 130.8                                                                             |
| 15  | 131.1                                                              | 131.0                                                                            | 131.1                                                                             |
| 16  | 131.5                                                              | 131.8                                                                            | 131.5                                                                             |
| 17  | 134.6                                                              | 134.6                                                                            | 134.6                                                                             |
| 18  | 134.8                                                              | 134.8                                                                            | 134.8                                                                             |
| 19  | 135.2                                                              | 135.5                                                                            | 135.2                                                                             |
| 20  | 137.5                                                              | 137.5                                                                            | 137.5                                                                             |
| 21  | 137.9                                                              | 137.5                                                                            | 137.9                                                                             |
| 22  | 177.5                                                              | 182.5                                                                            | 177.4                                                                             |

## References

- S1) B. M. Trost and M. J. Bartlett, *Org. Lett.*, 2012, **14**, 1322.
- S2) E. E. Kwan, J. R. Scheerer and D. A. Evans, *J. Org. Chem.*, 2013, **78**, 175.
- S3) E. C. McLaughlin and M. P. Doyle, *J. Org. Chem.*, 2008, **73**, 4317.
- S4) M. Morita, S. Tanabe and Y. Kobayashi, *Synlett*, 2019, **30**, 1351.
- S5) B. Schmidt and S. Audörsch, *J. Org. Chem.*, 2017, **82**, 1743.
- S6) O. Hartmann and M. Kalesse, *Org. Lett.*, 2012, **14**, 3064.
- S7) N. Ogawa, S. Sone, S. Hong, Y. Lu and Y. Kobayashi, *Synlett*, 2020, **31**, 1735.
- S8) J. W. Winkler, J. Uddin, C. N. Serhan and N. A. Petasis, *Org. Lett.*, 2013, **15**, 1424.
- S9) F. Urbitsch, B. L. Elbert, J. Llaveria, P. E. Streatfeild and E. A. Anderson, *Org. Lett.*, 2020, **22**, 1510.

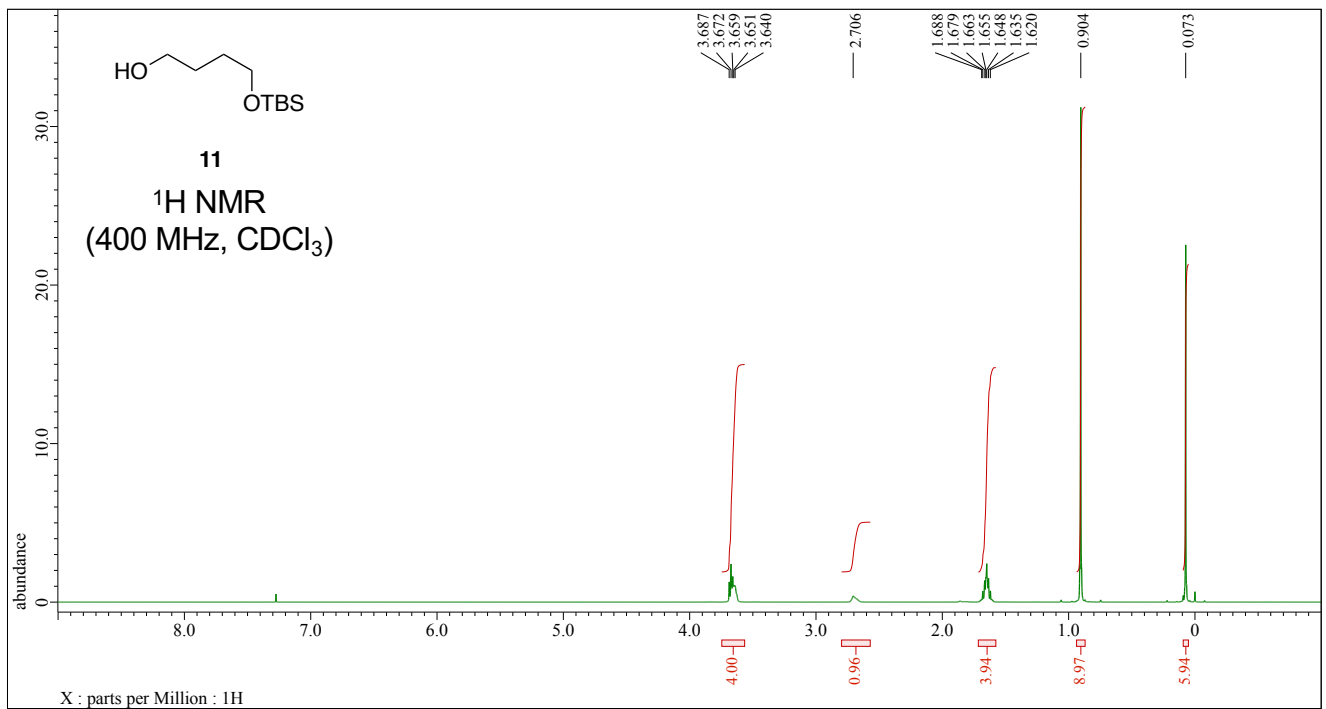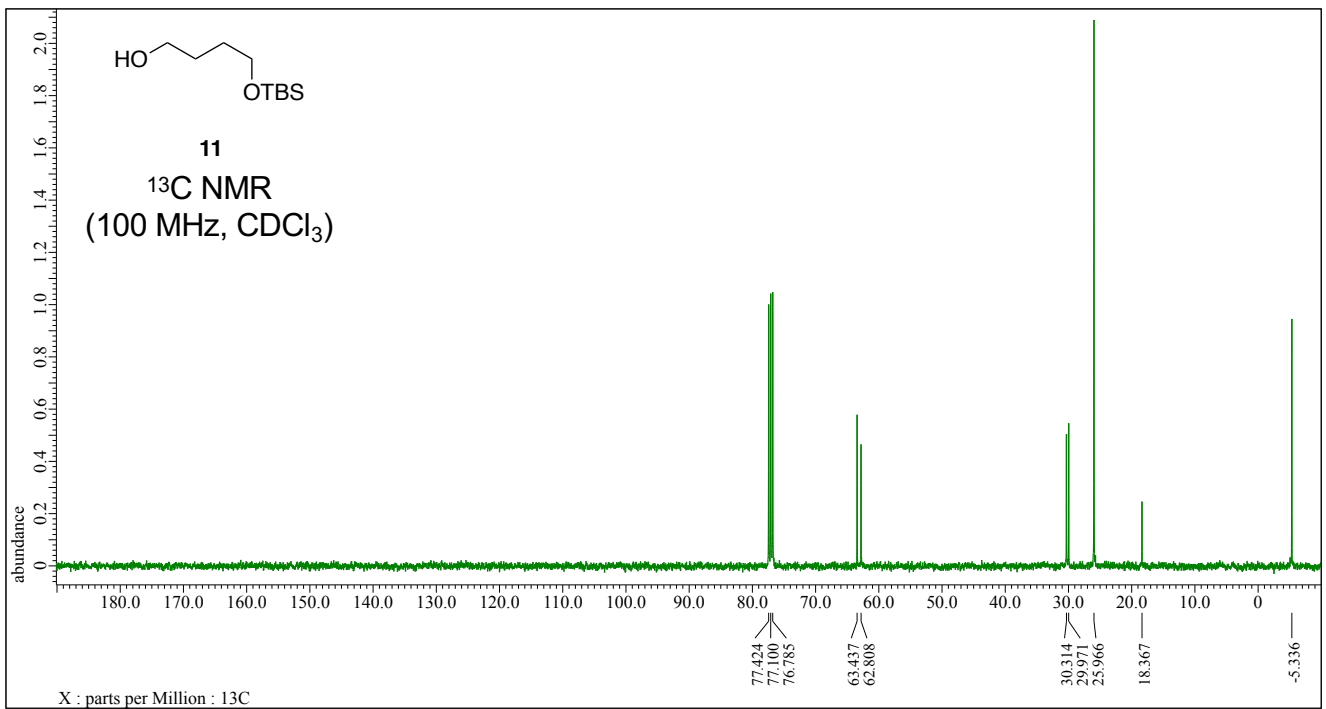

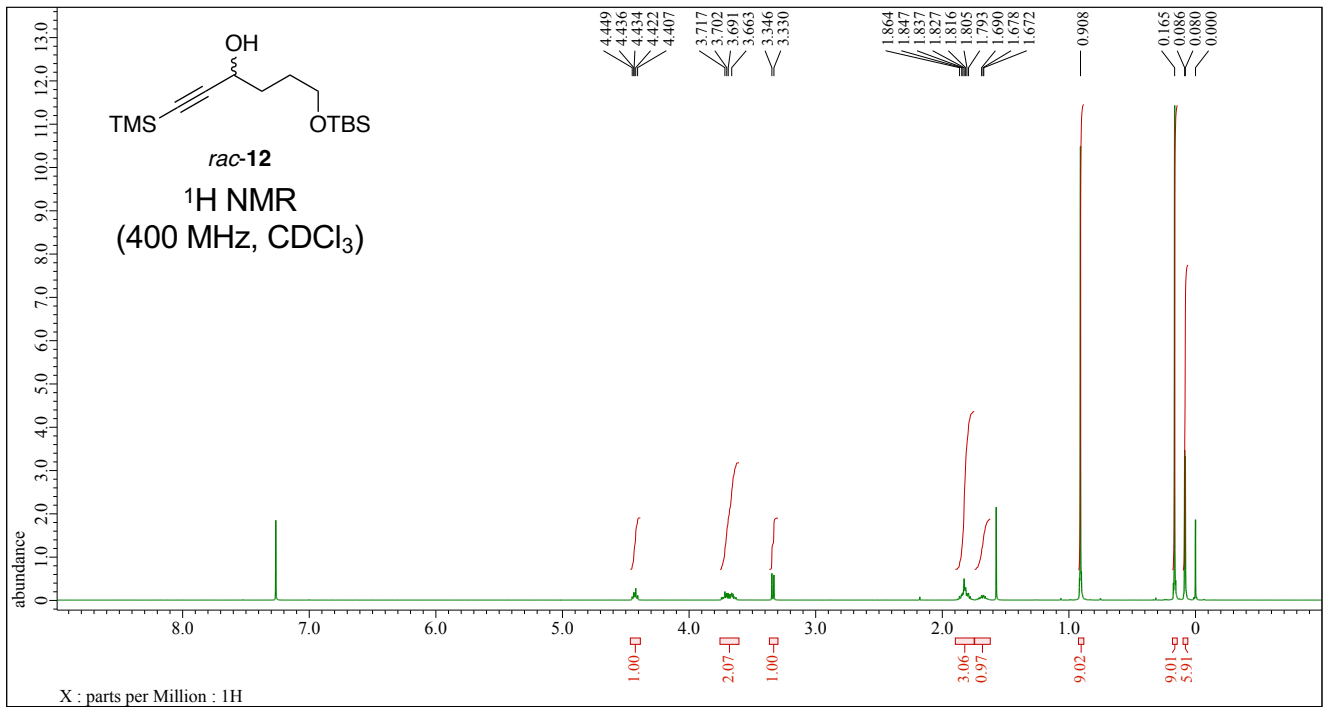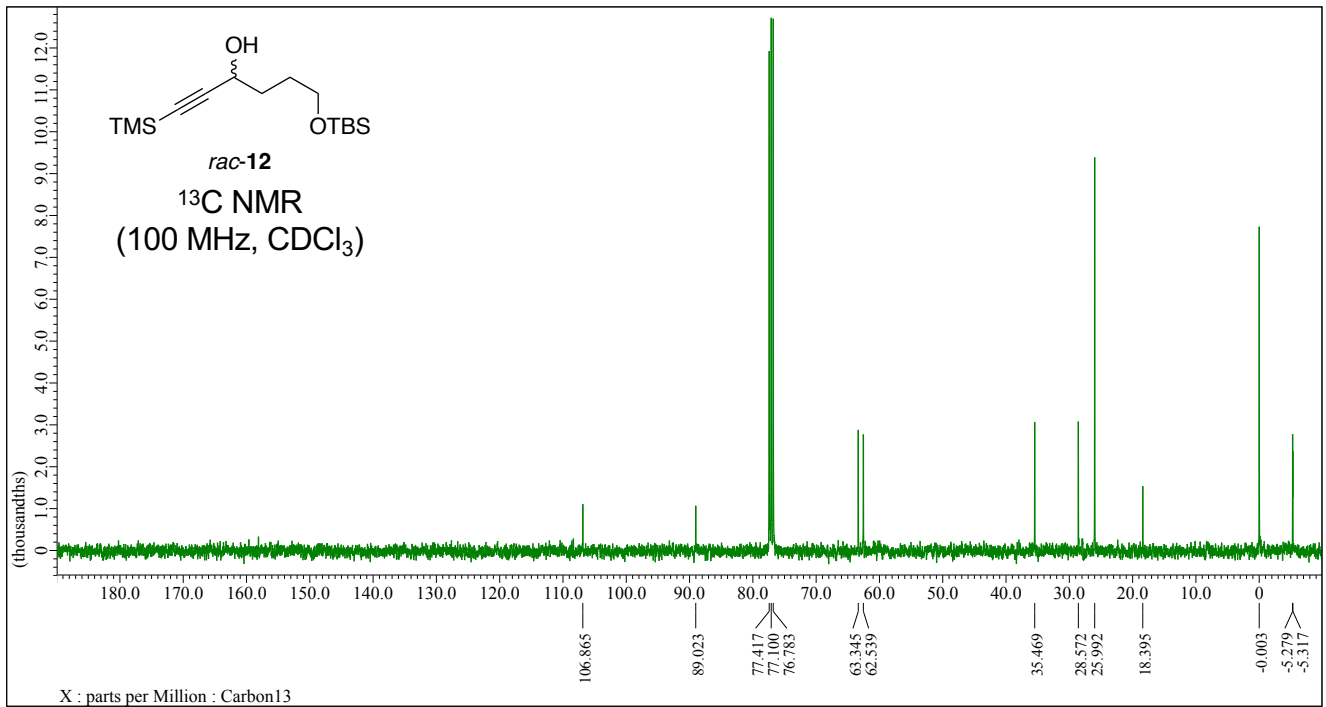



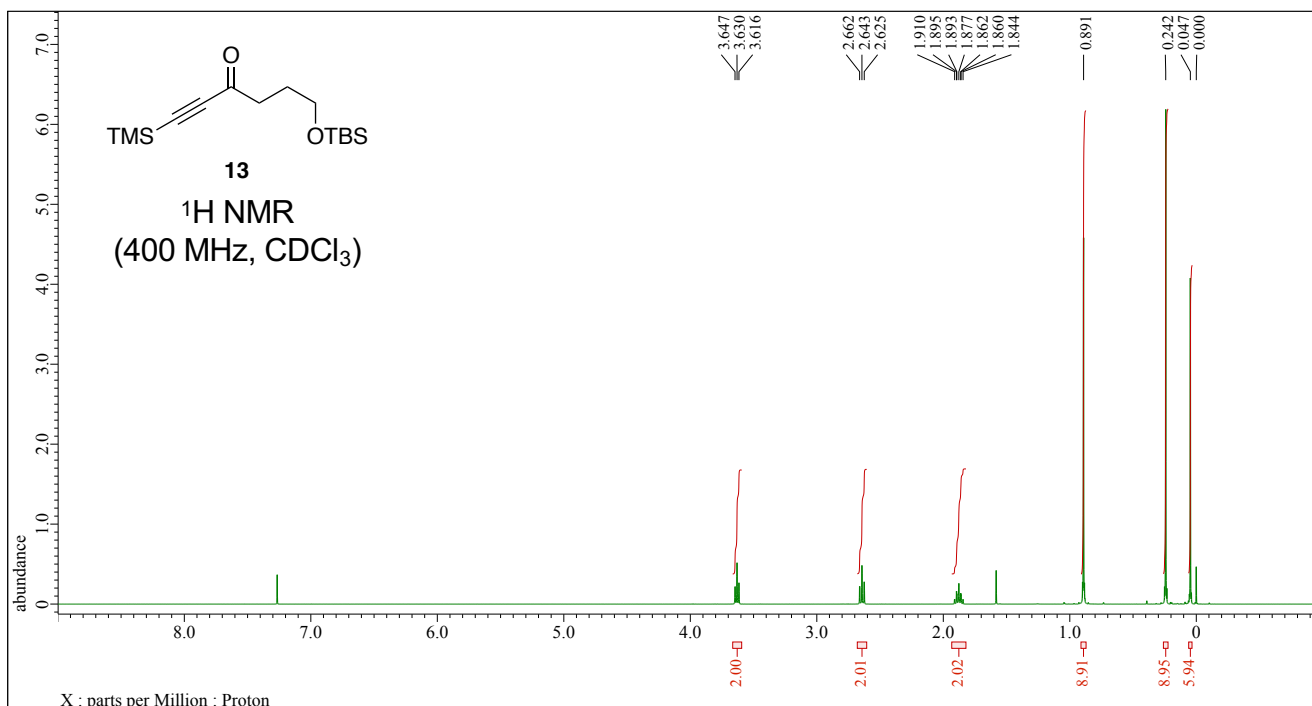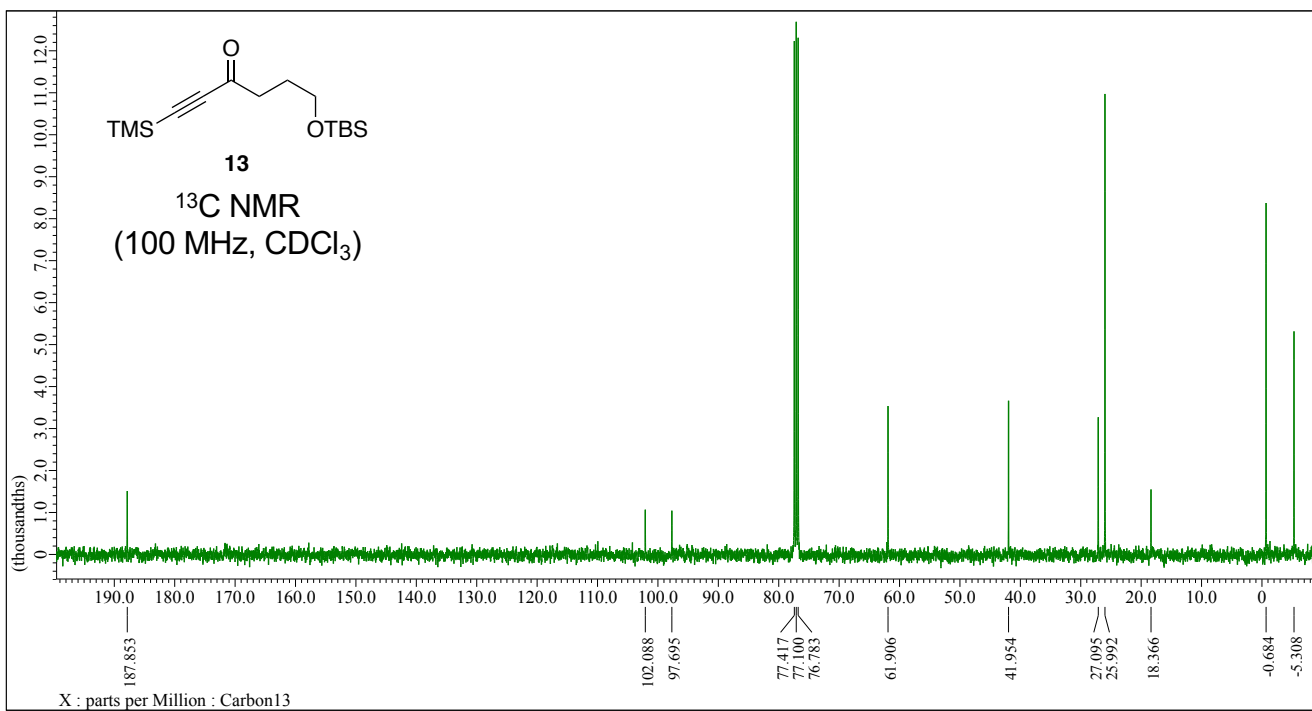

## HPLC analysis

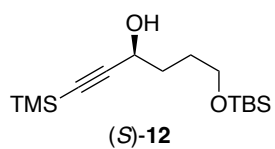

$$\begin{aligned} ee &= (98.763 - 1.237) \times 100 / (98.763 + 1.237) \\ &= 97.526 \\ &\approx 98\% \end{aligned}$$

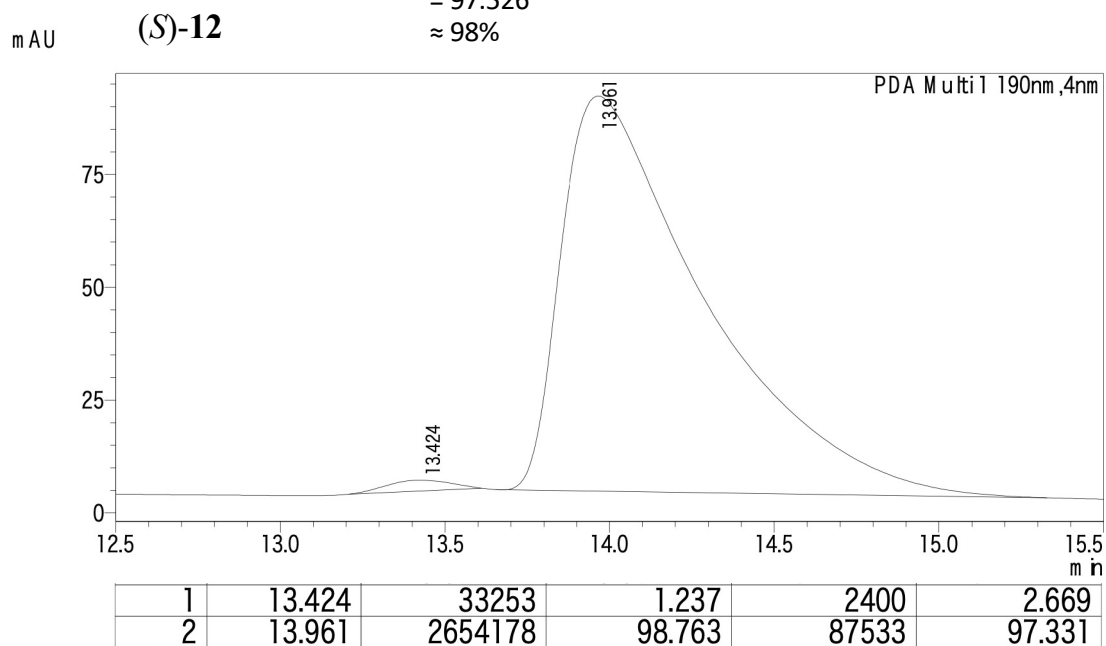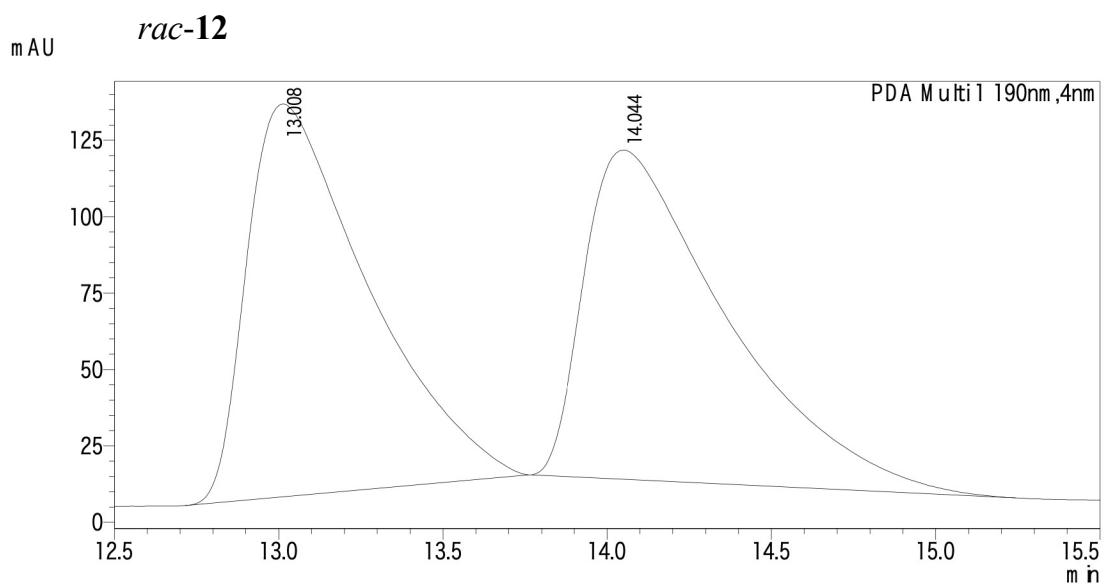

Conditions: Chiralcel OD-H, hexane, 1.0 mL/min, 35 °C

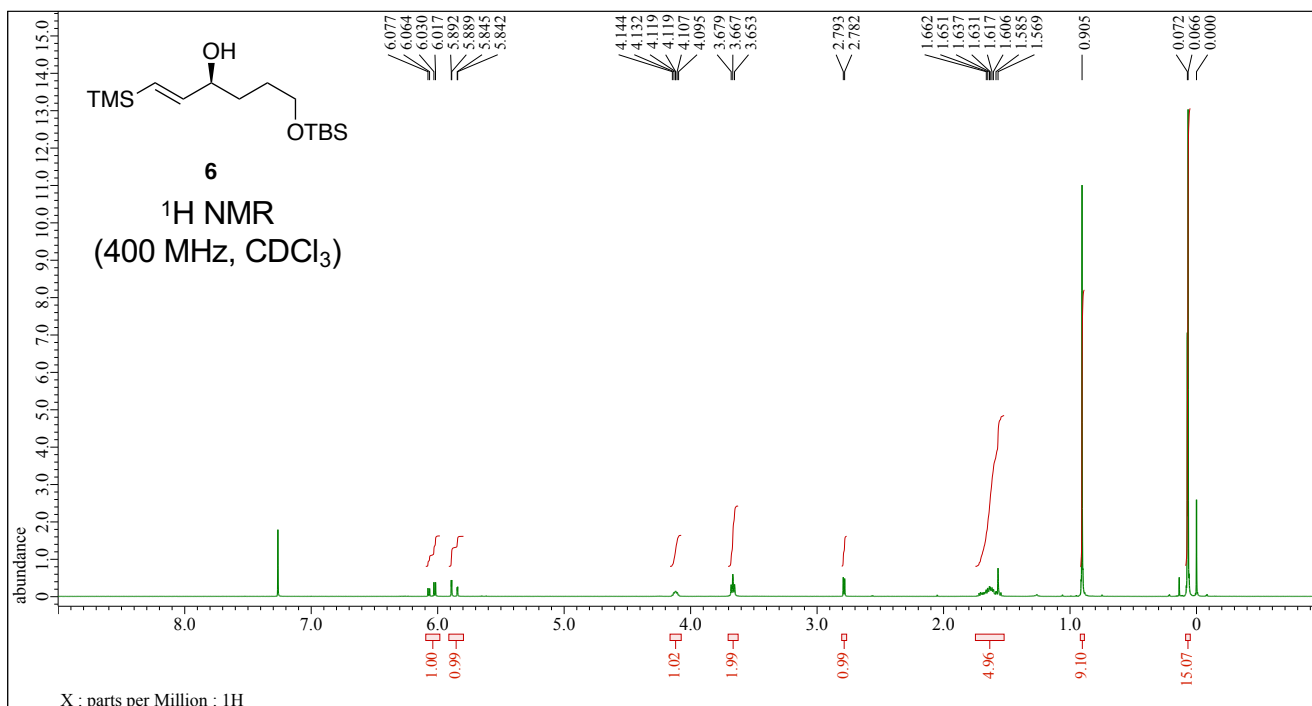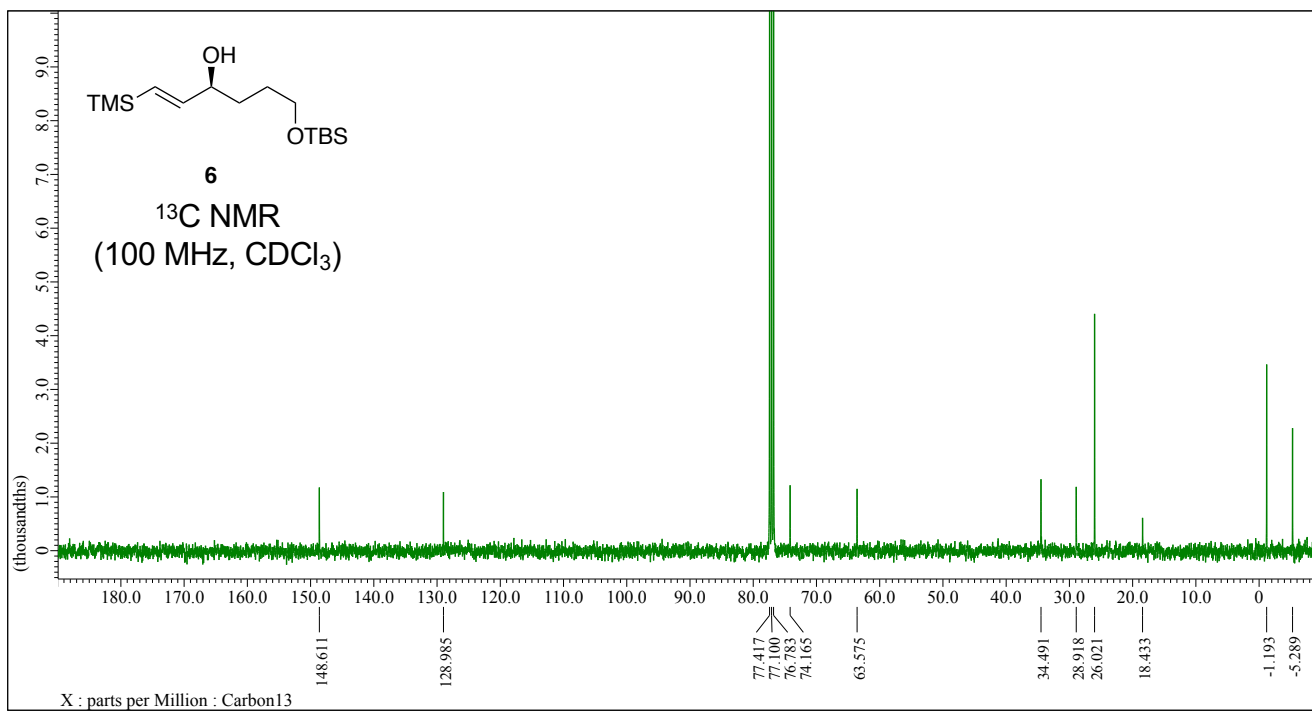

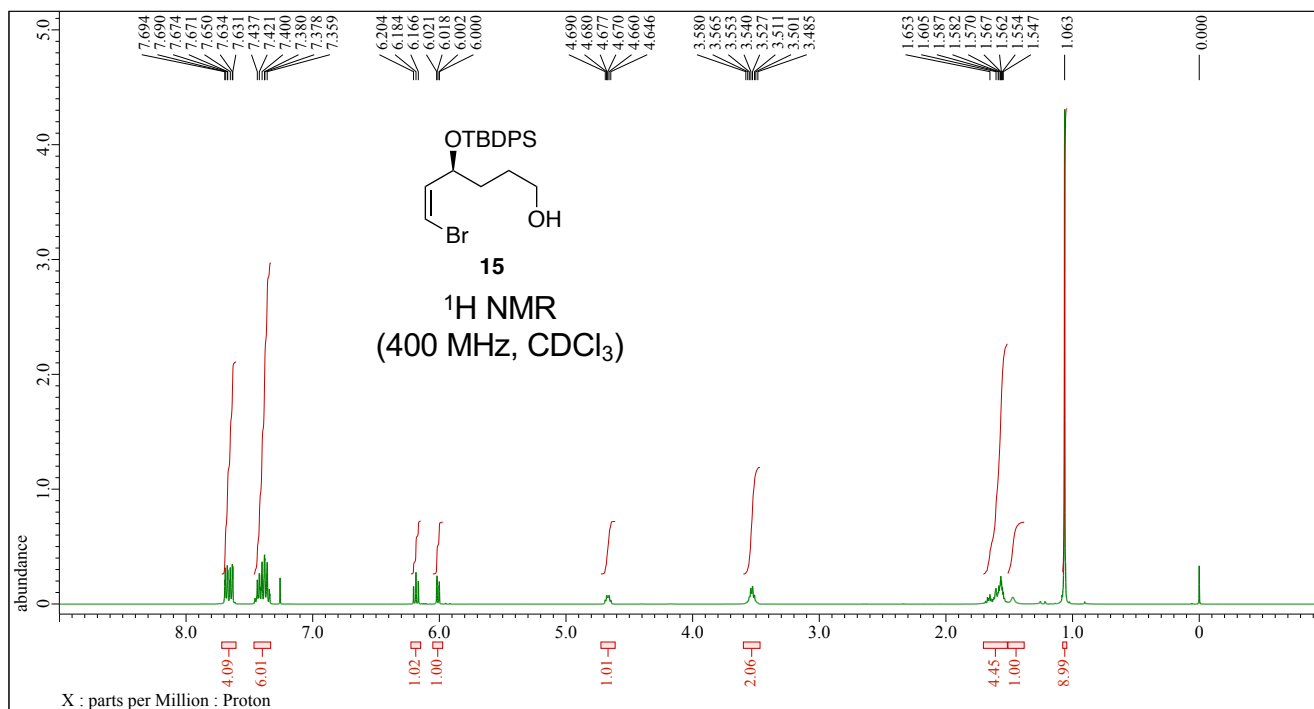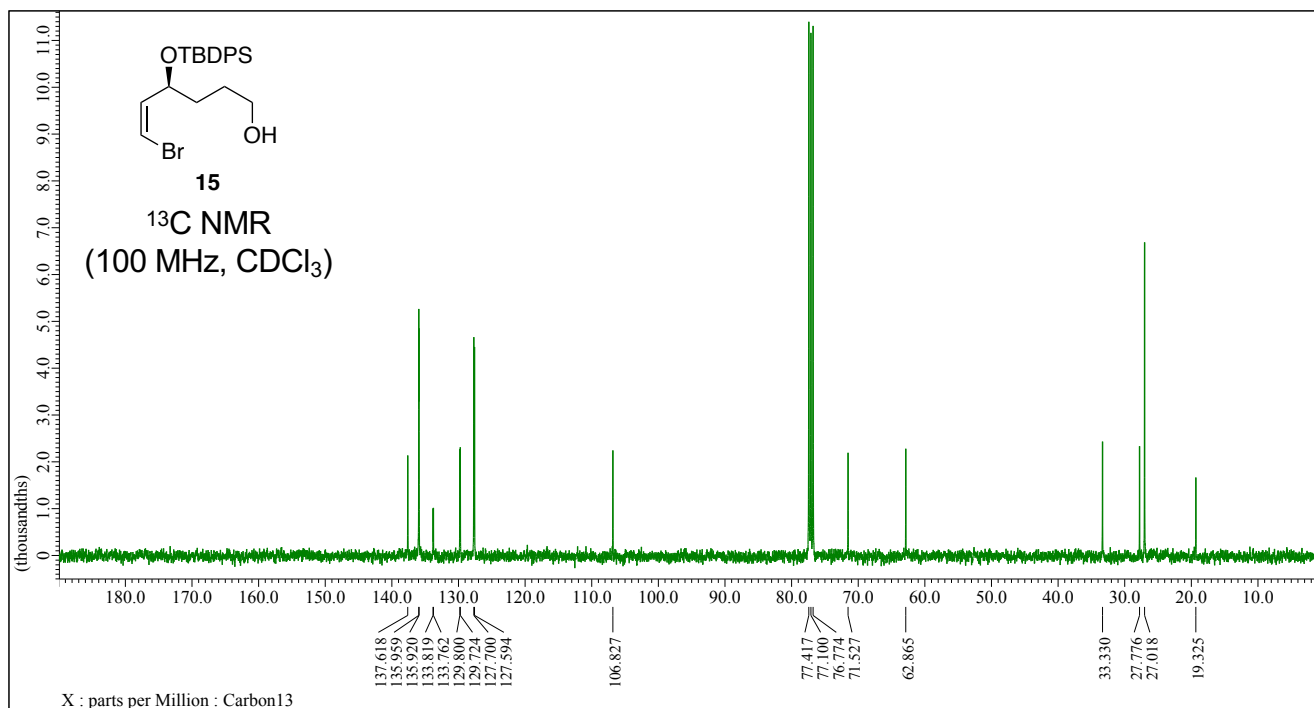

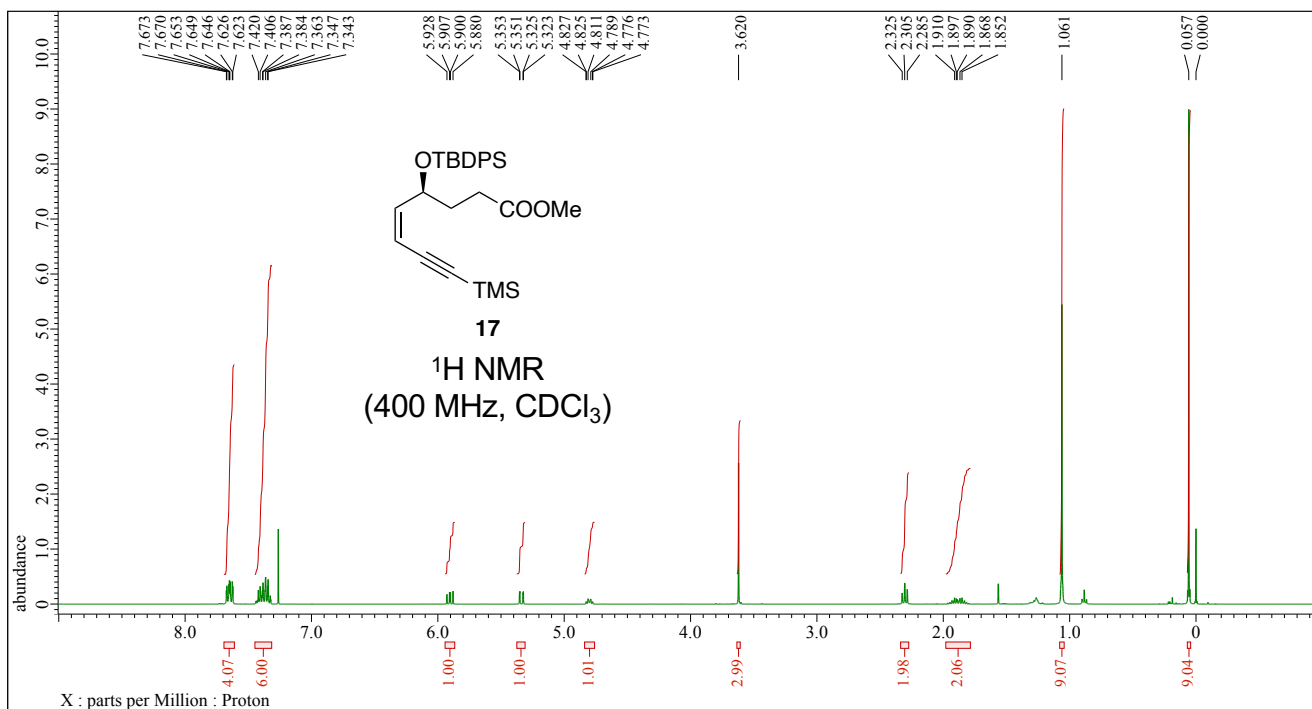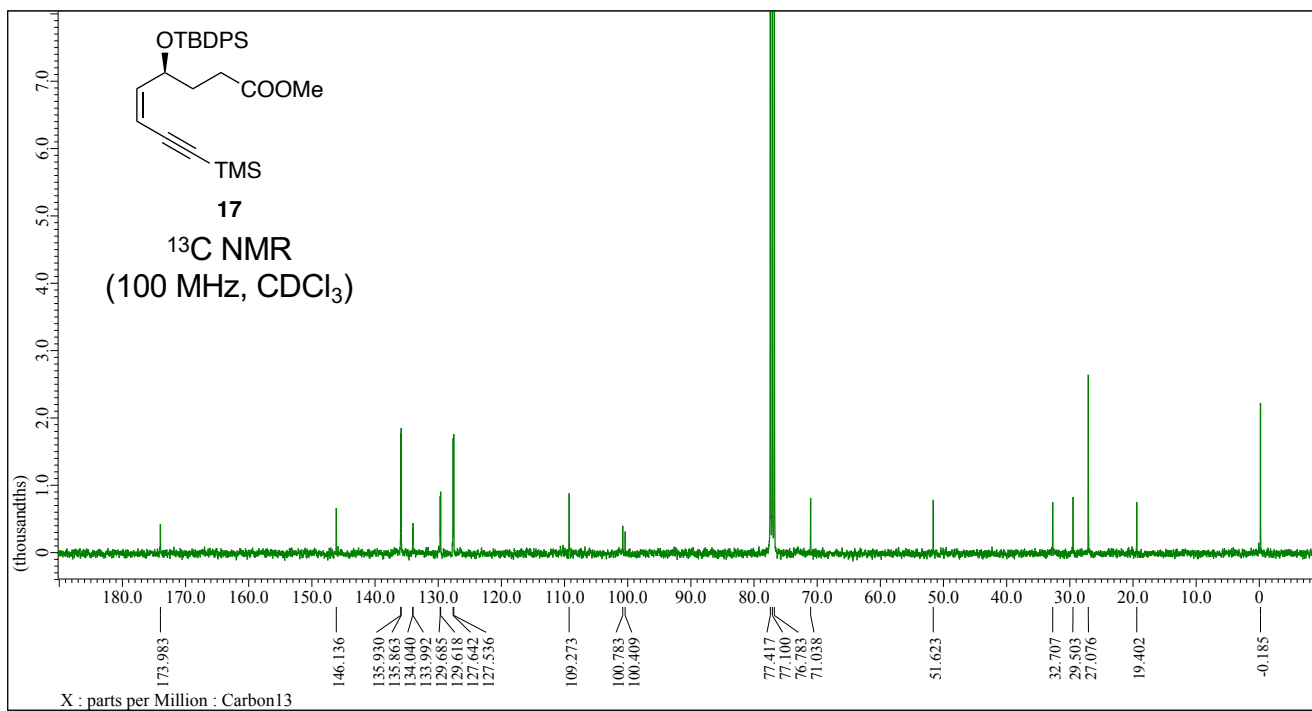

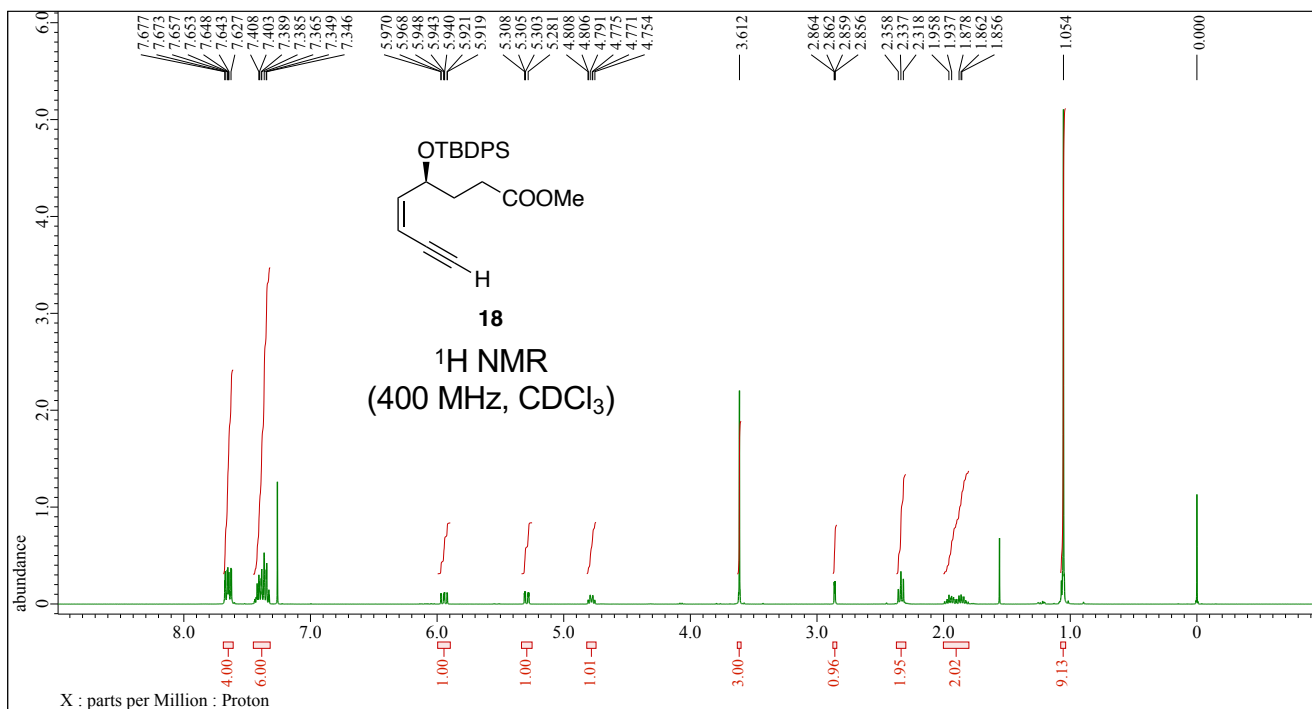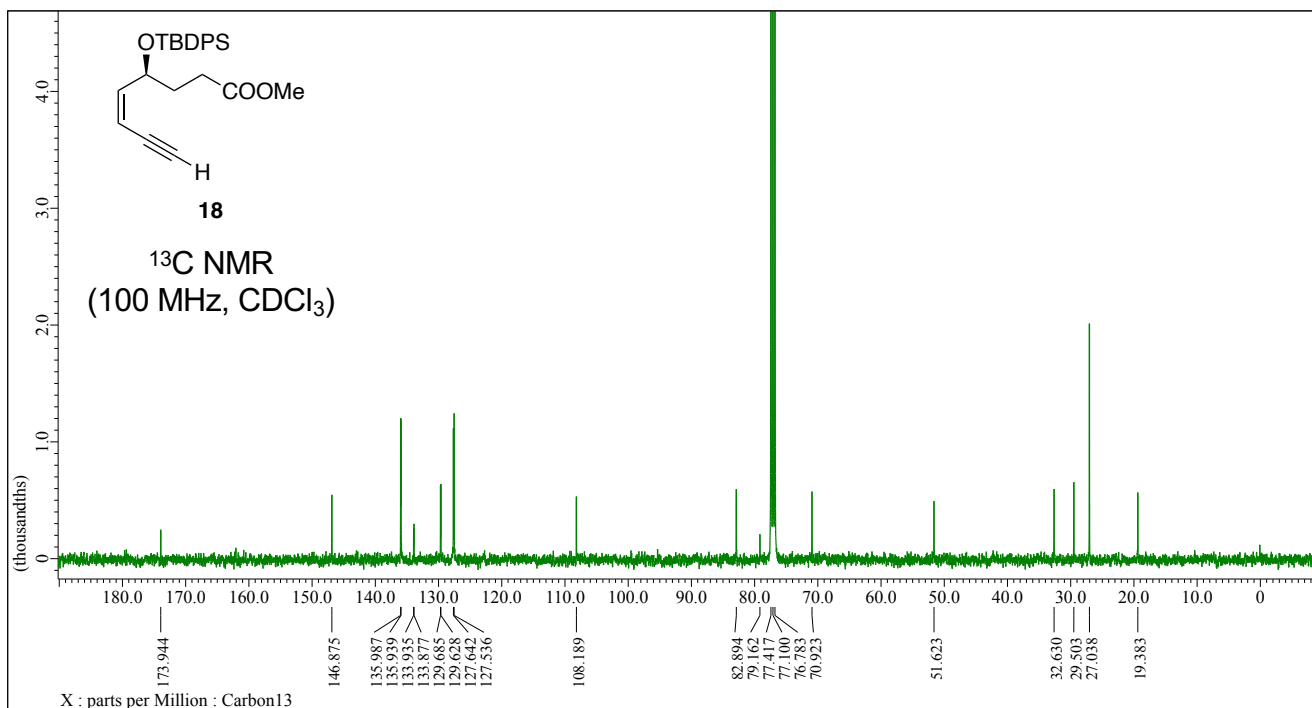

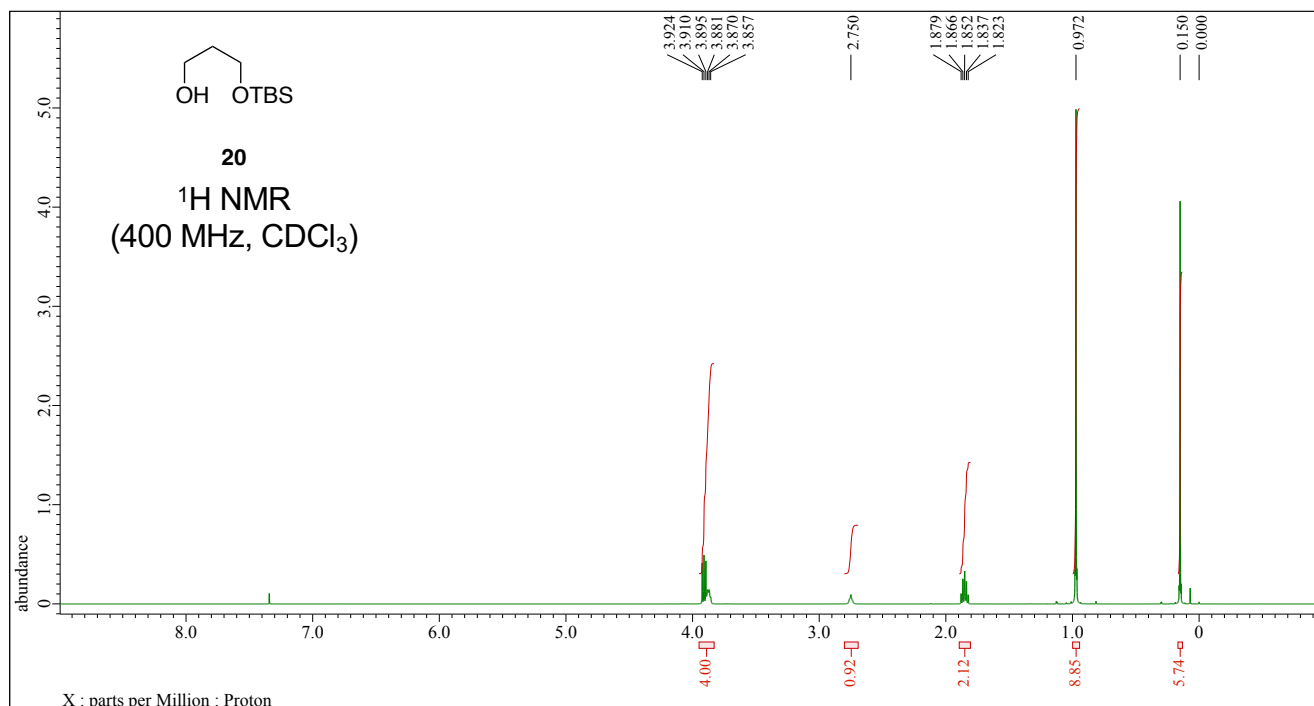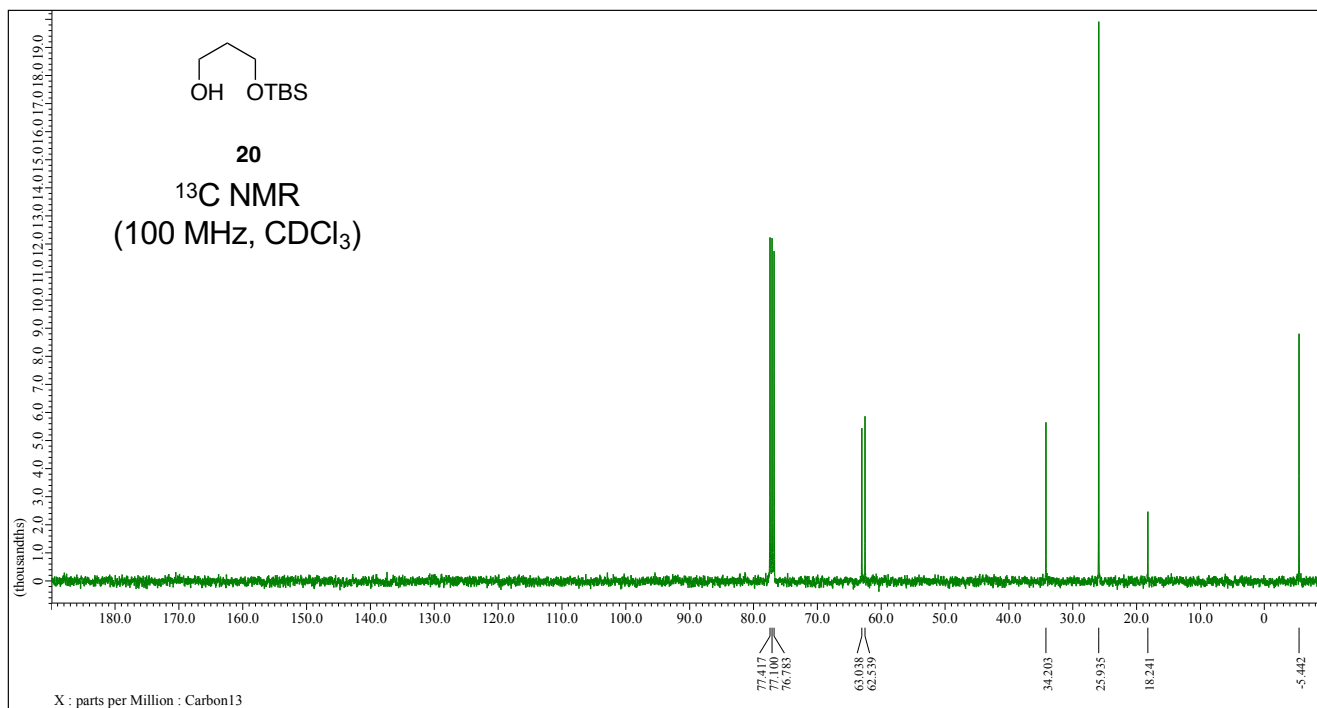

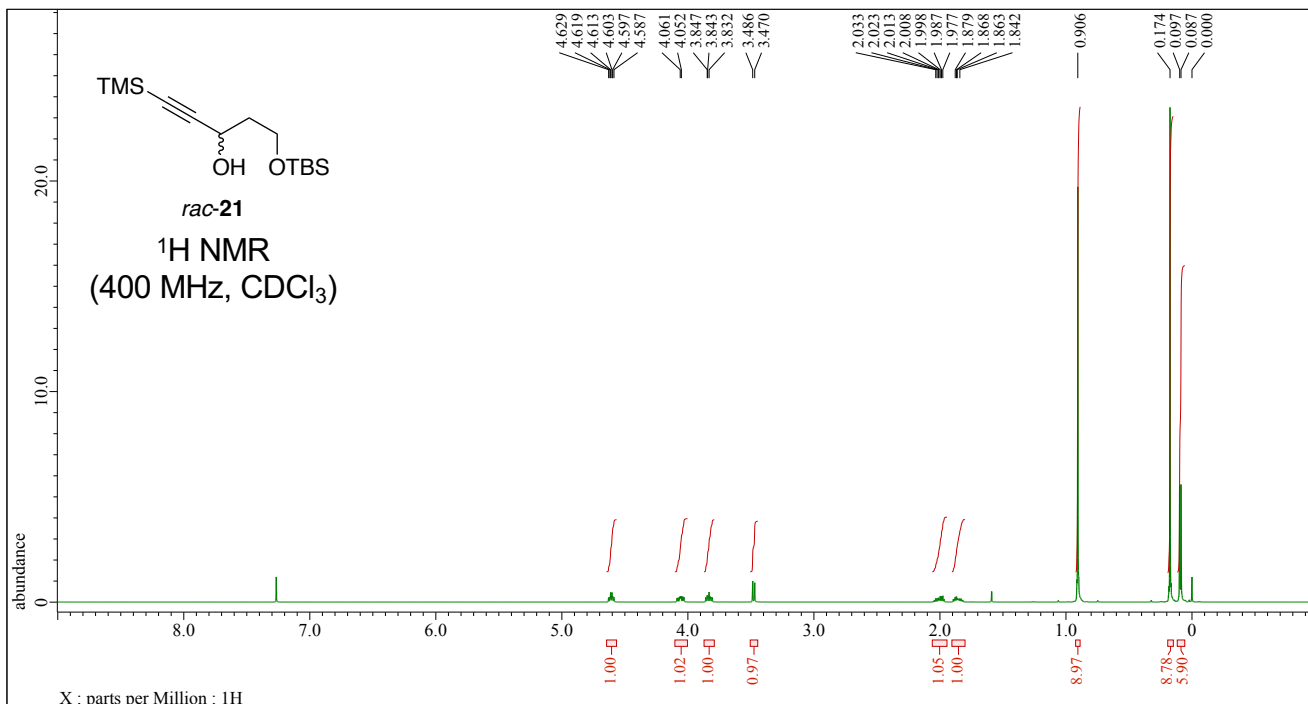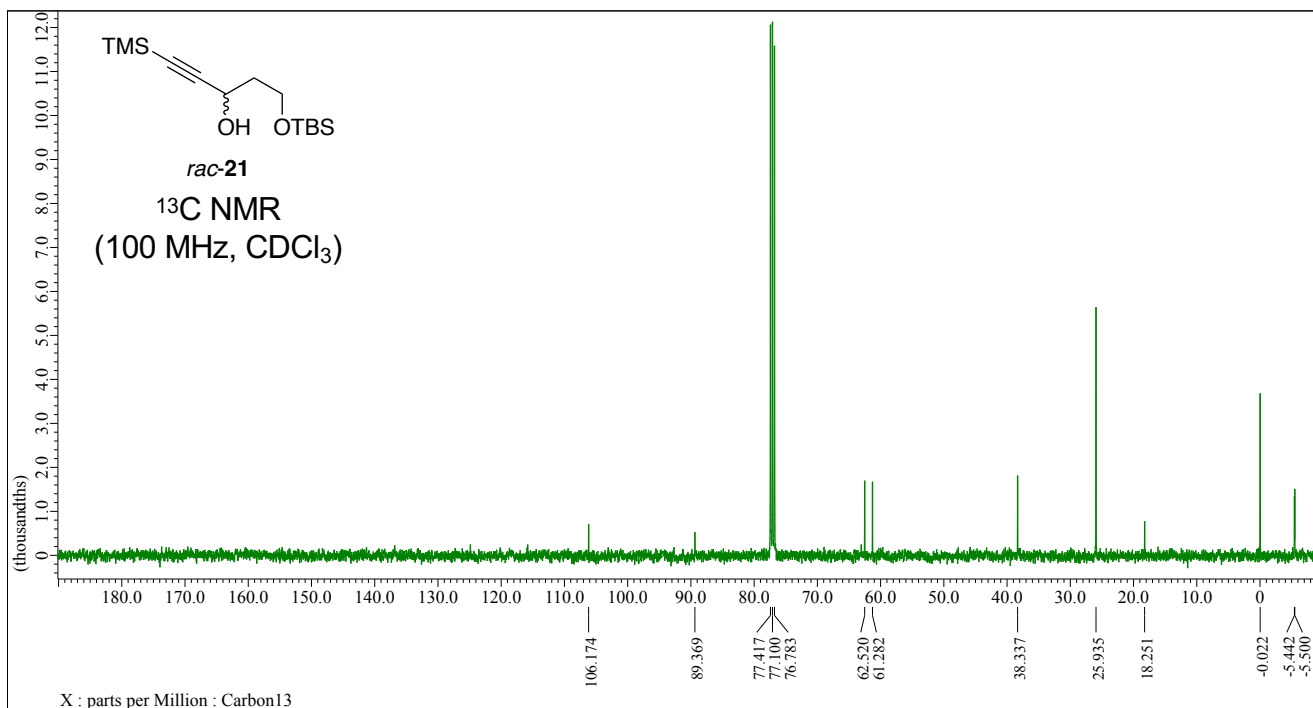



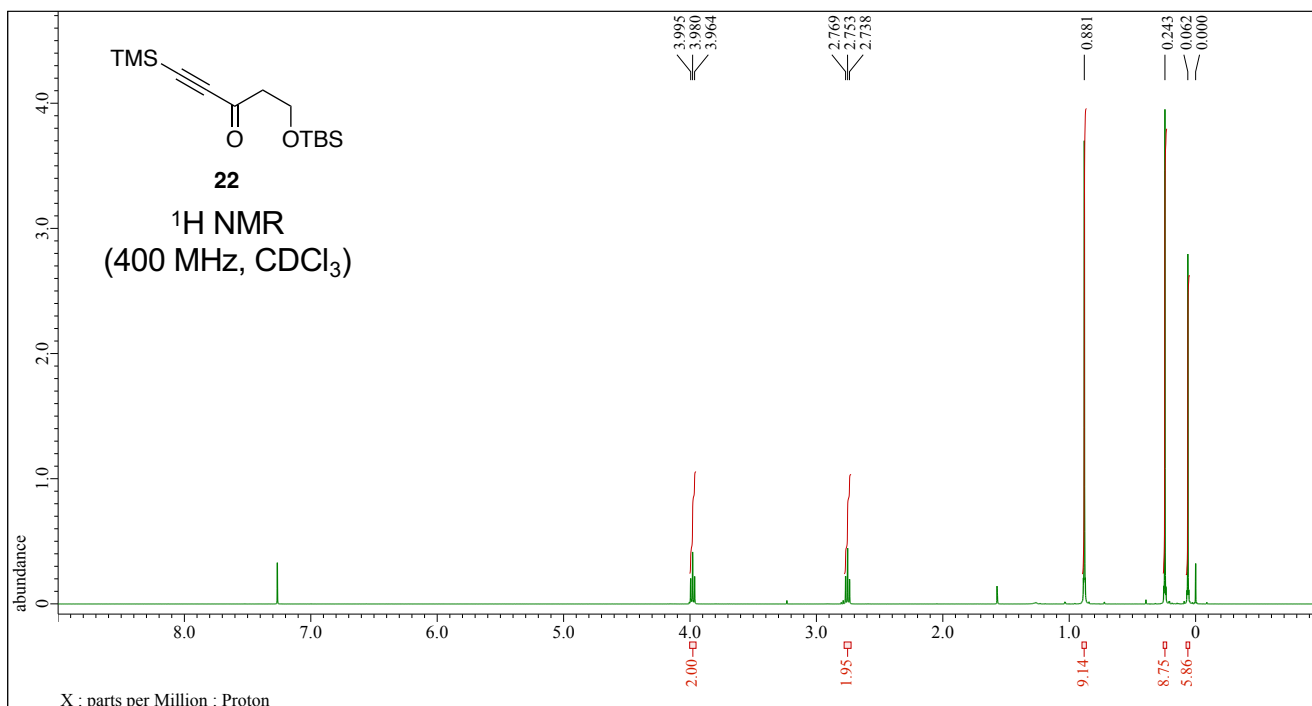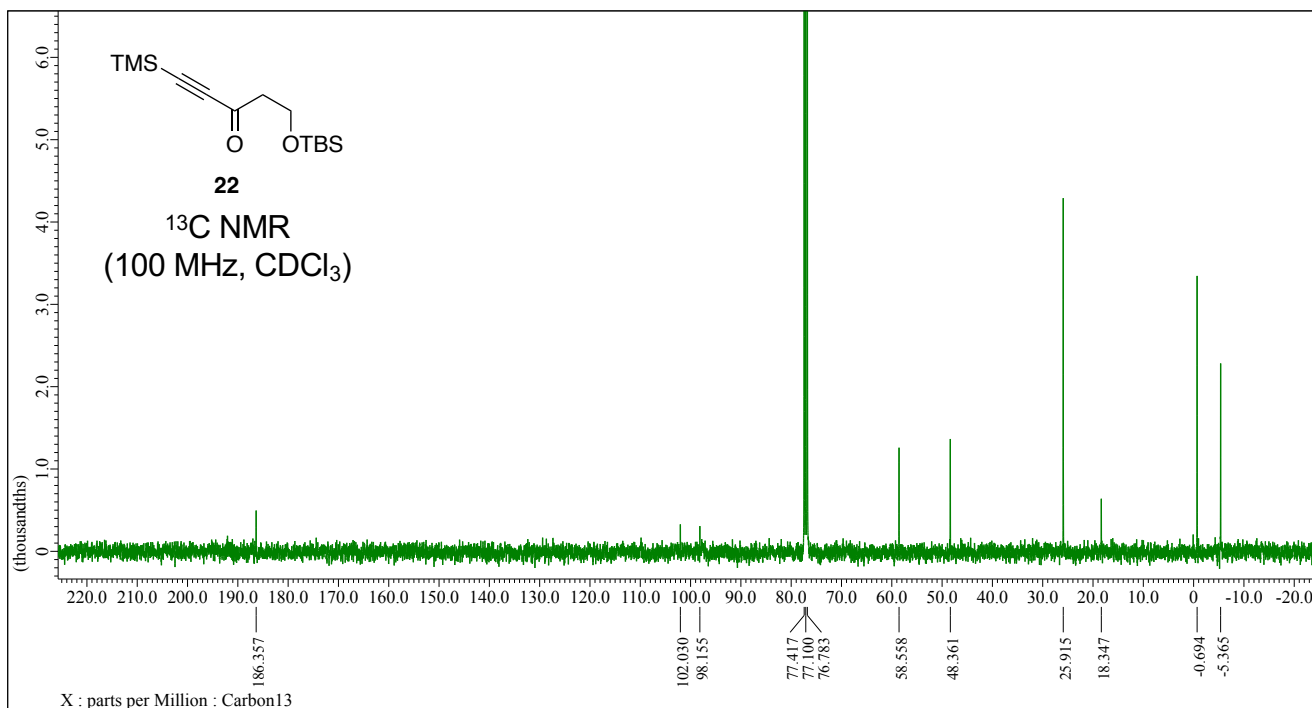

## HPLC analysis

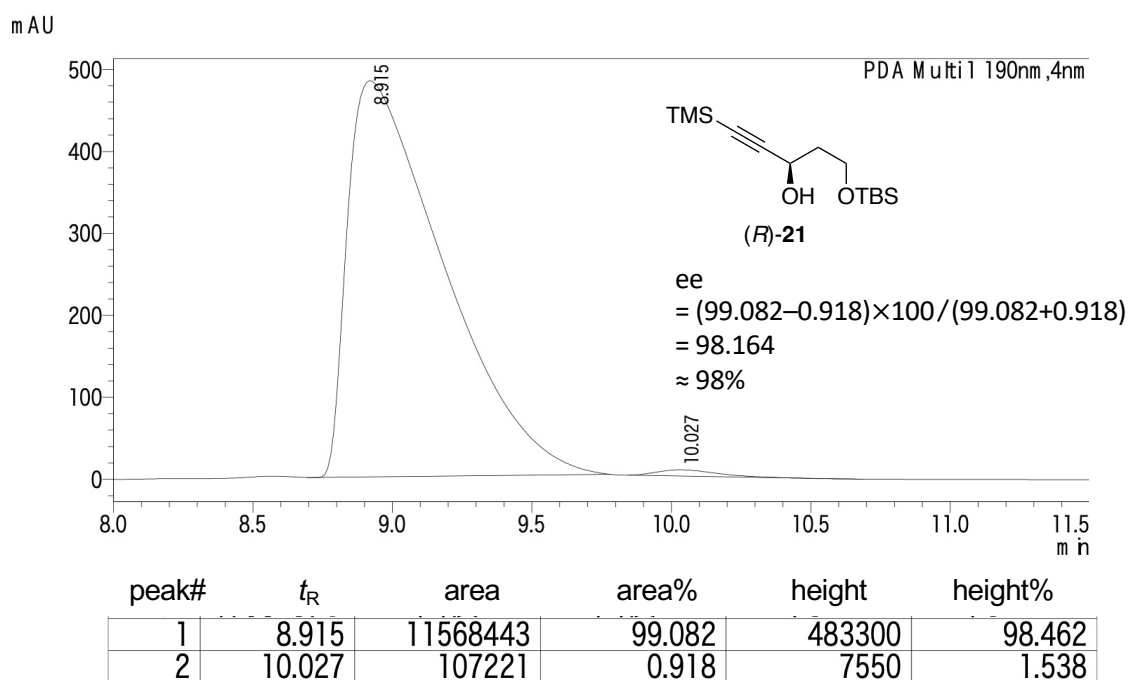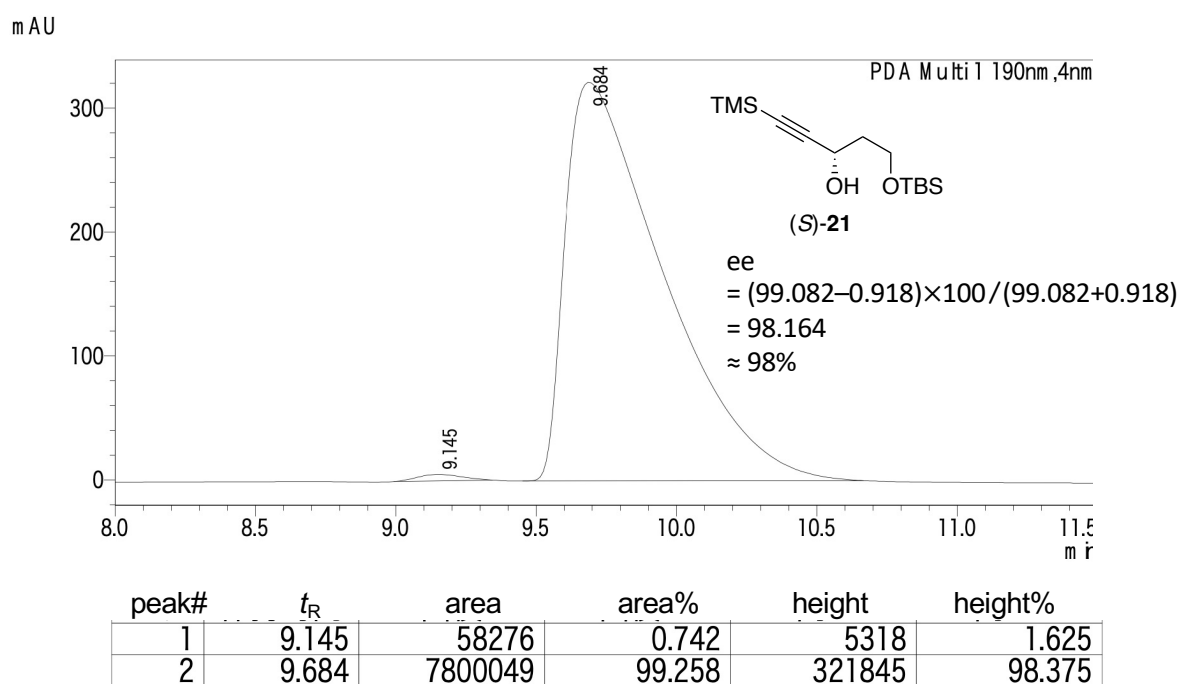

Conditions: Chiralcel OD-H, hexane, 1.0 mL/min, 35 °C

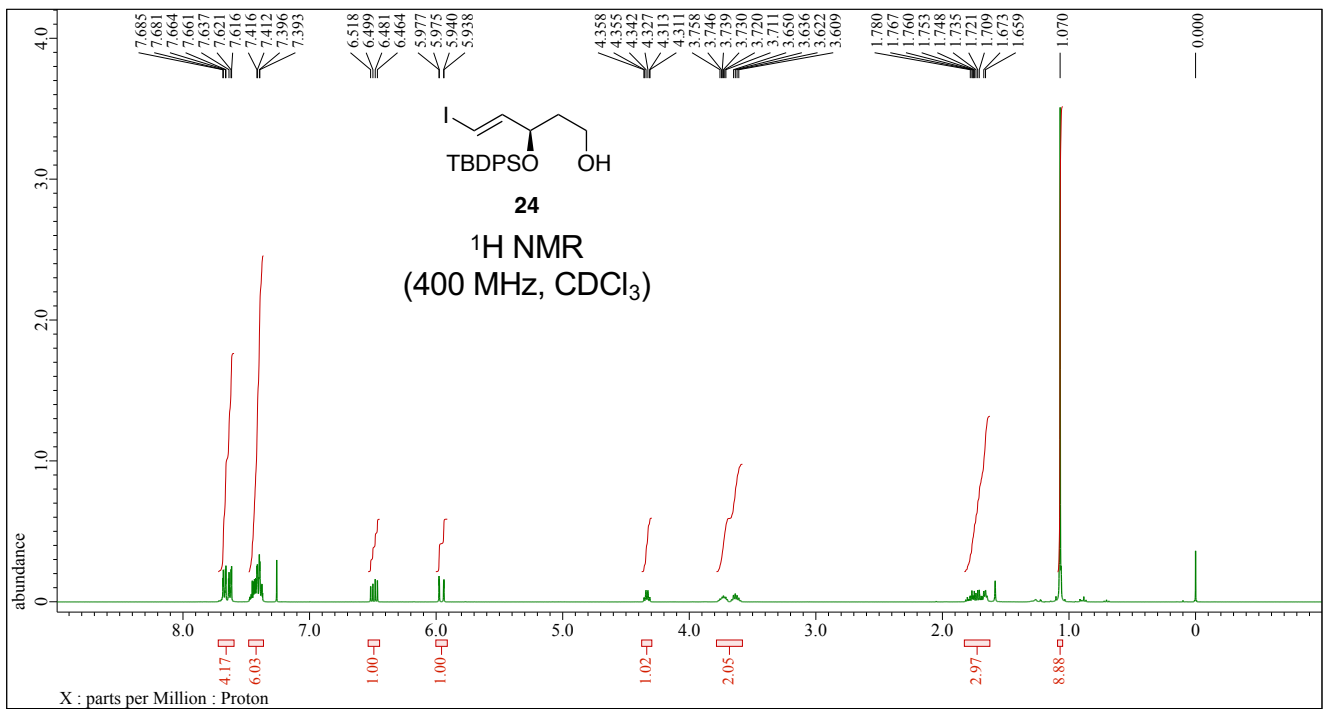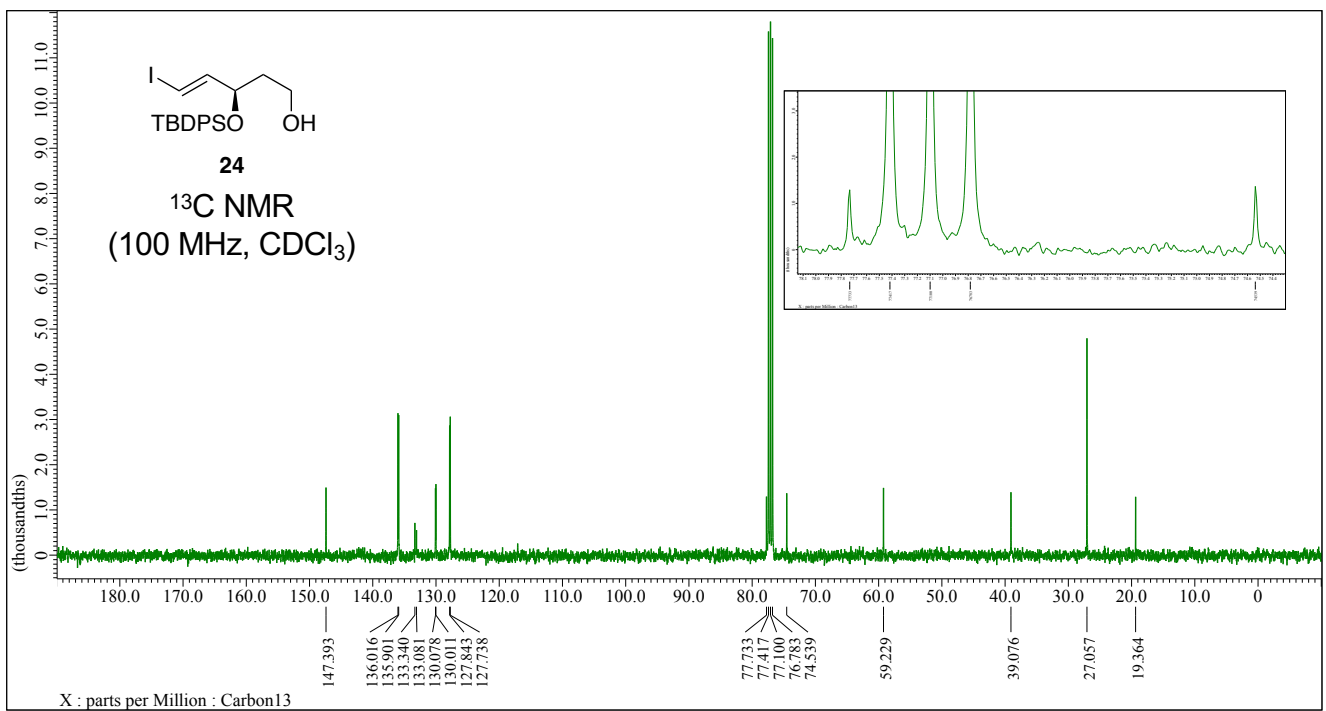

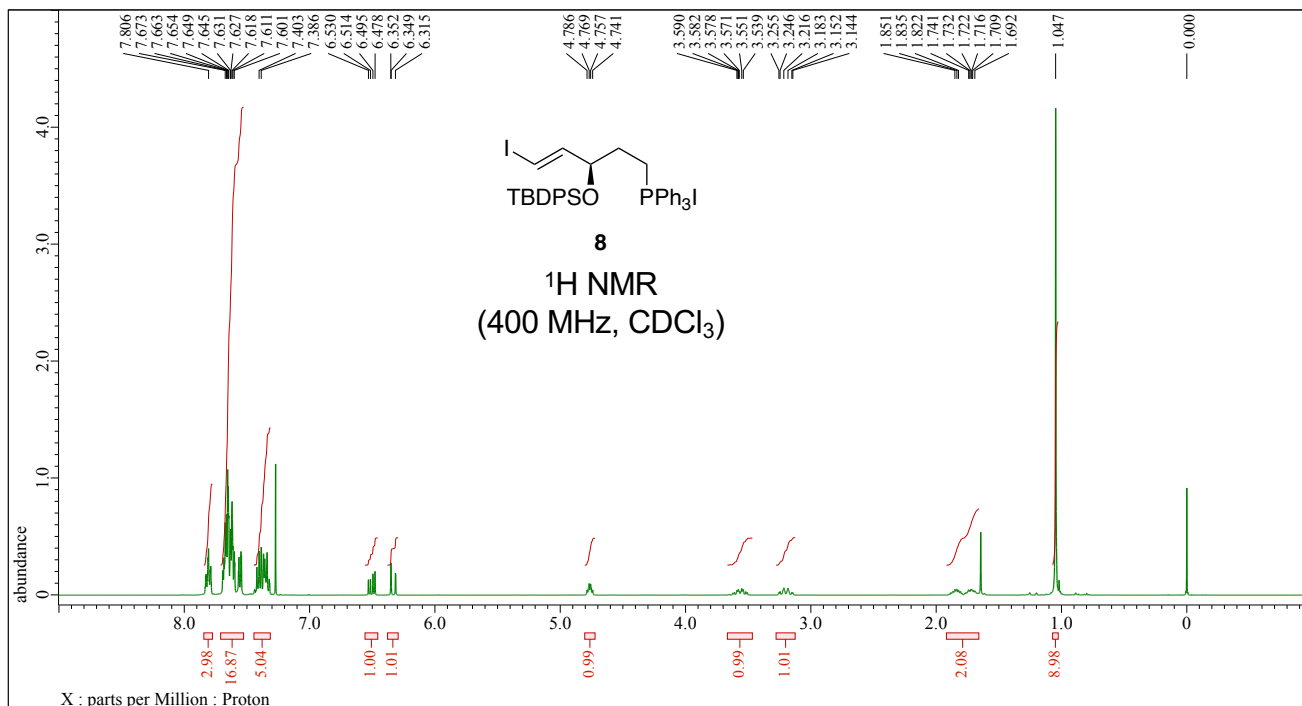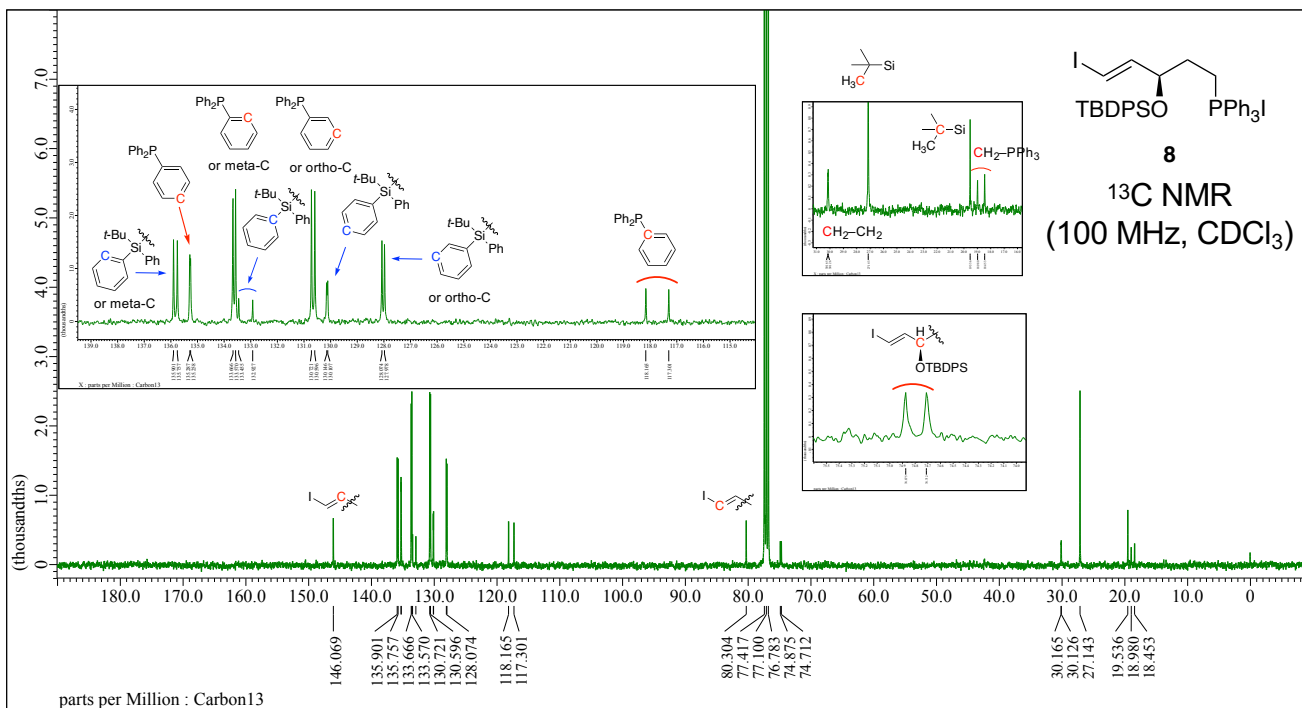

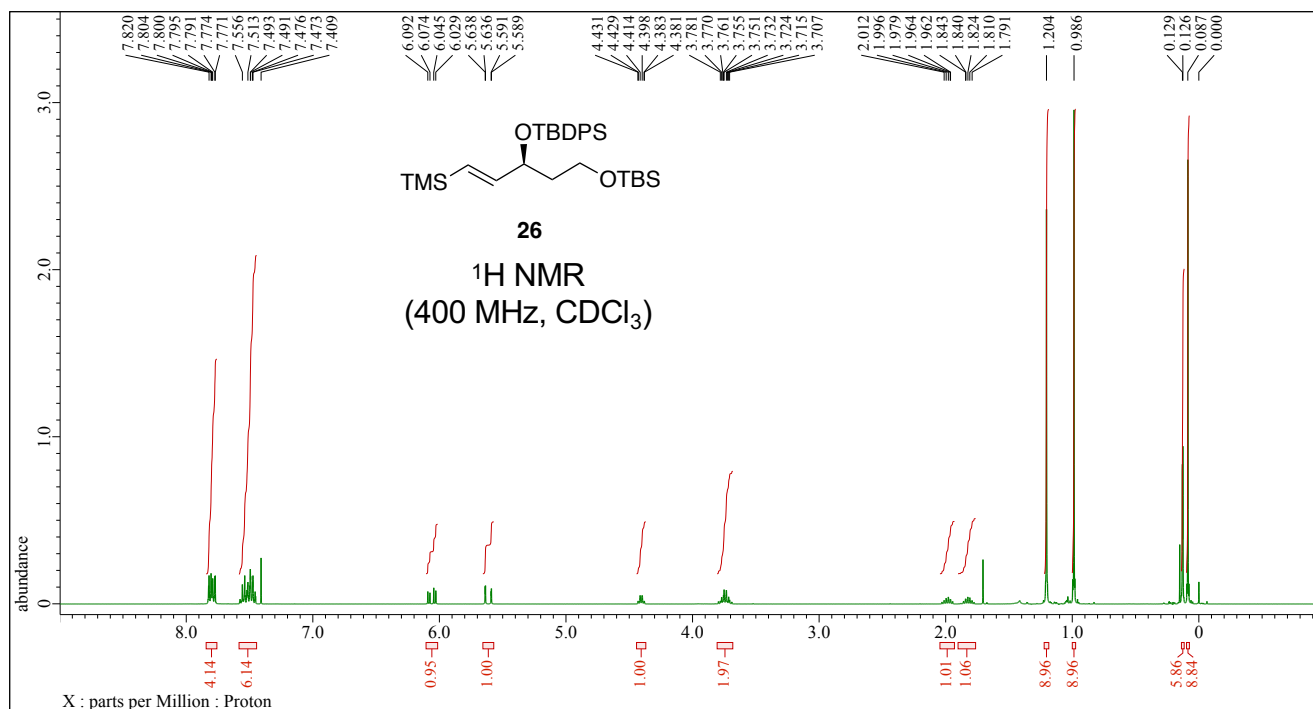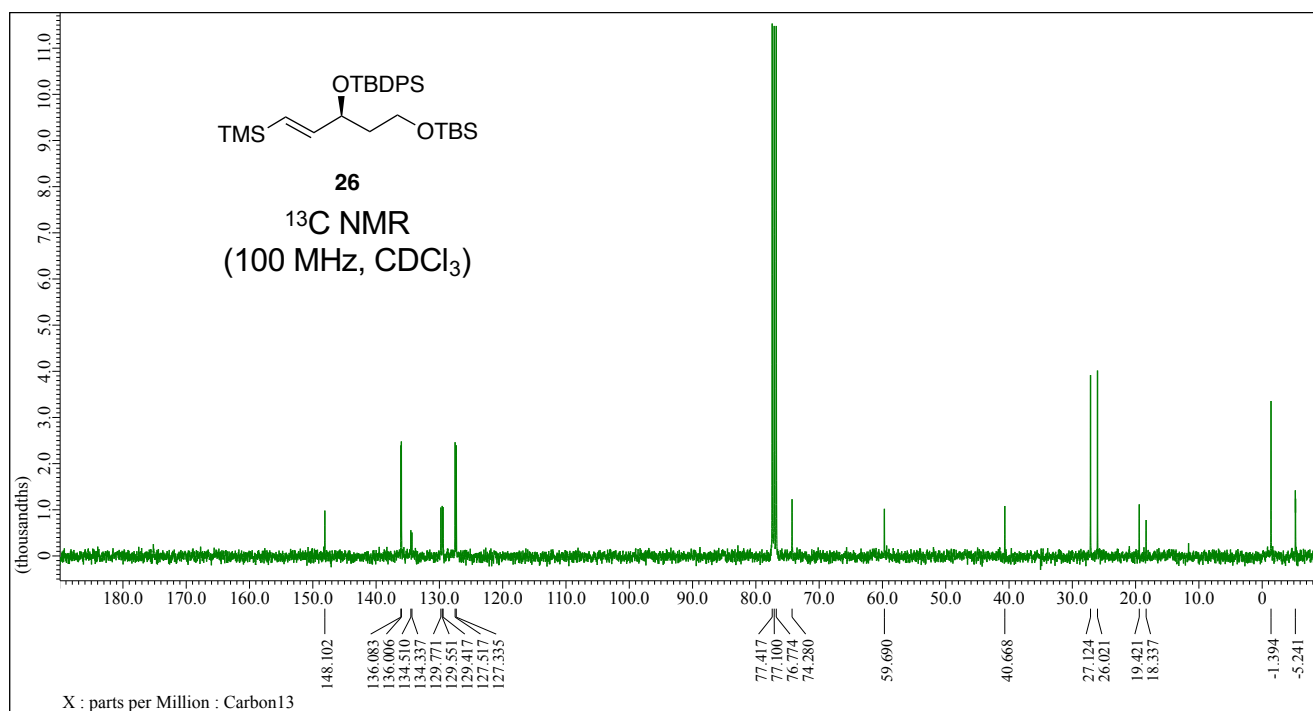

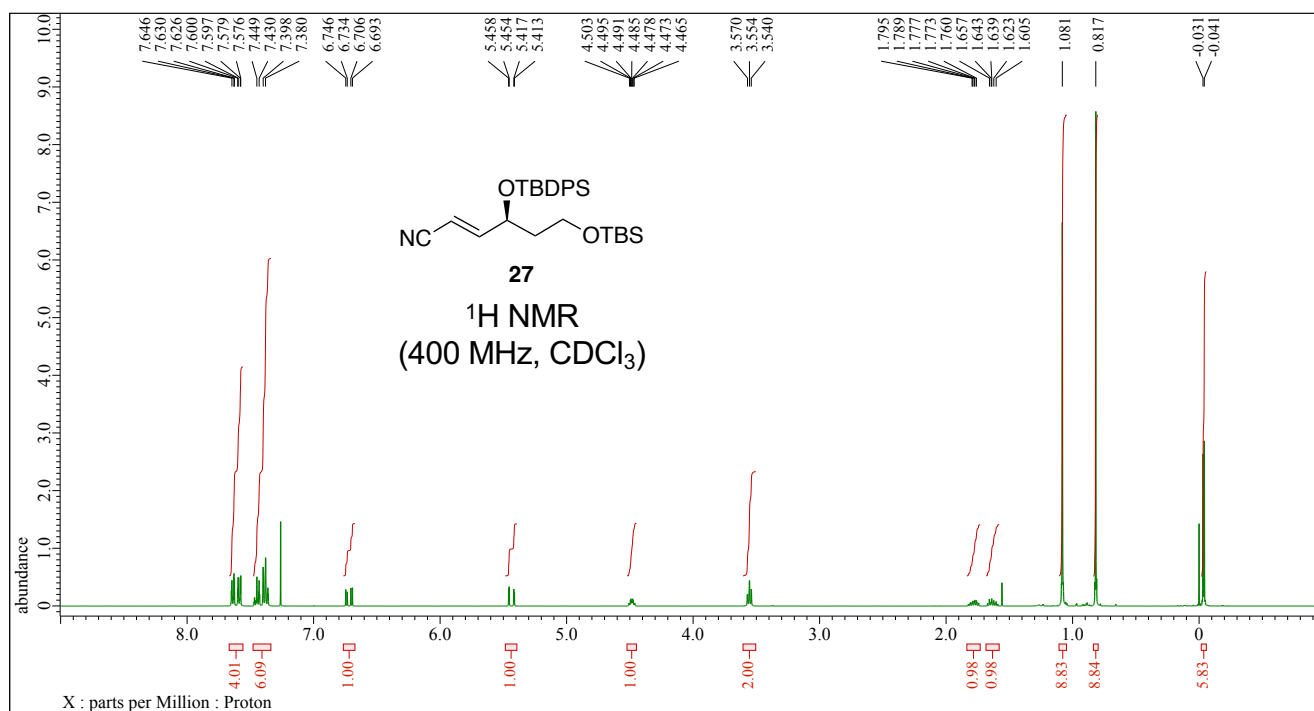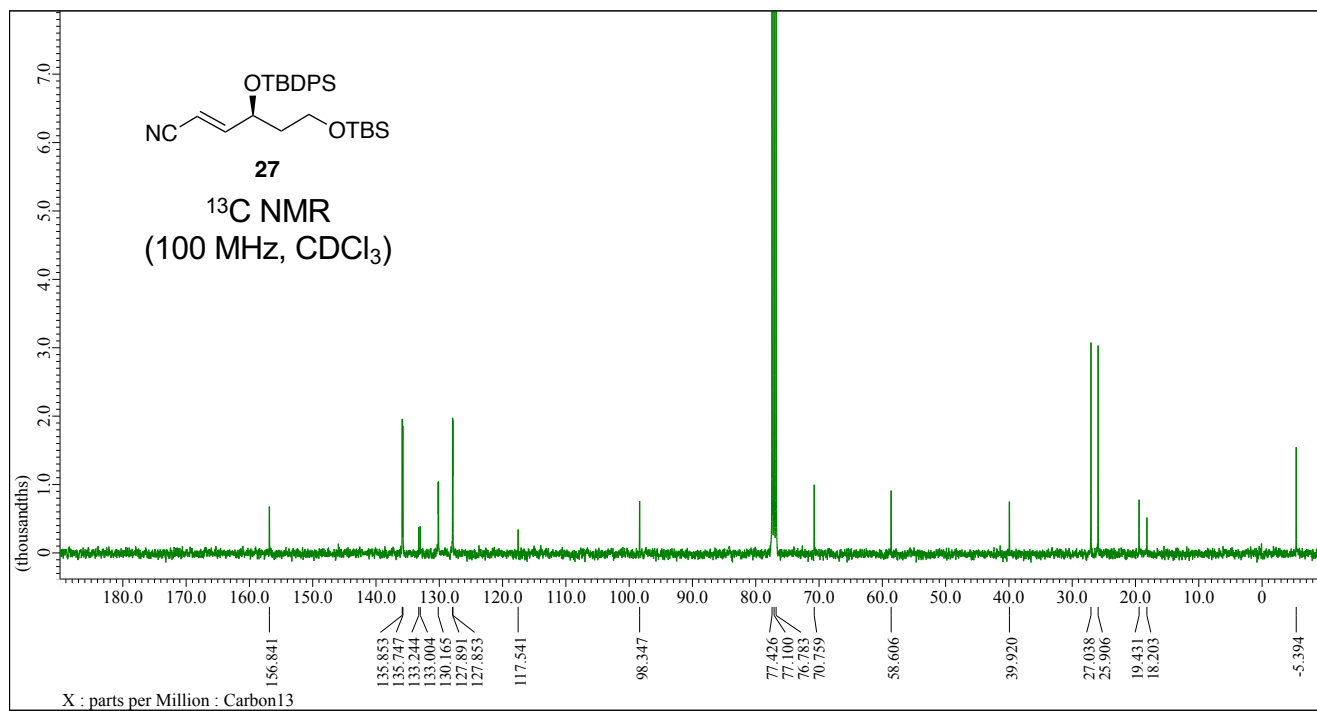

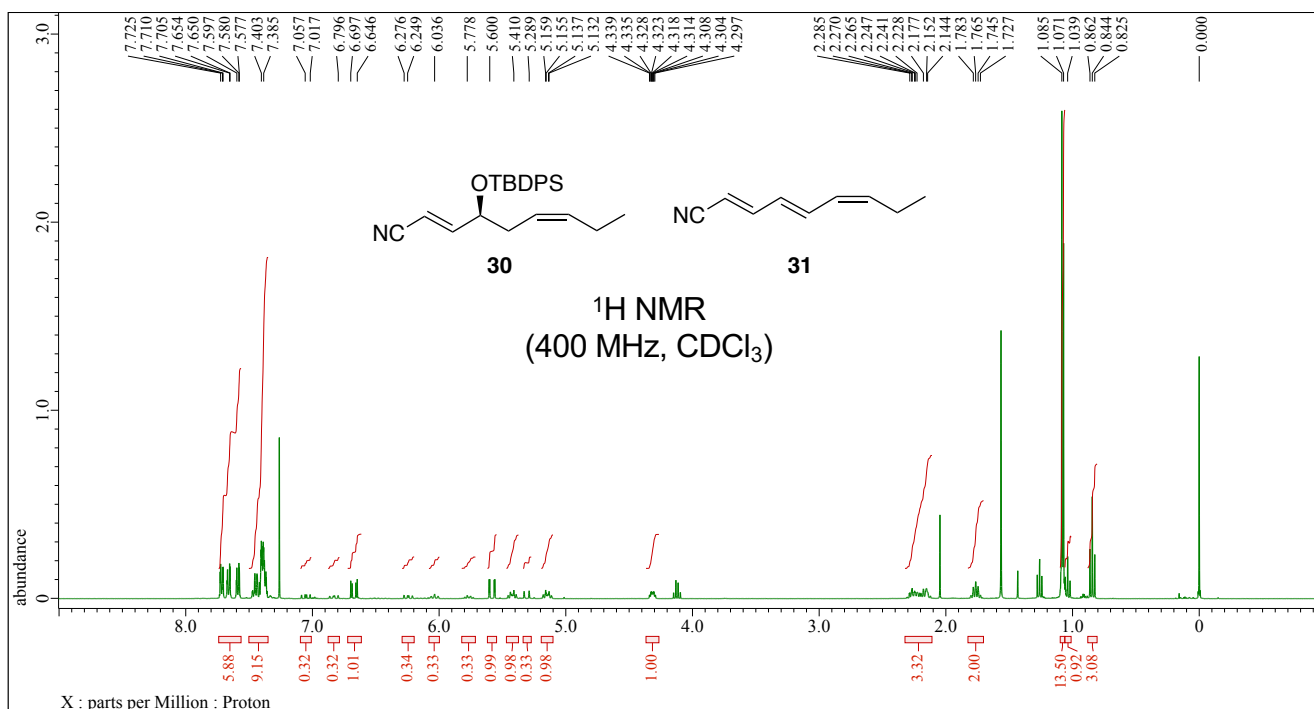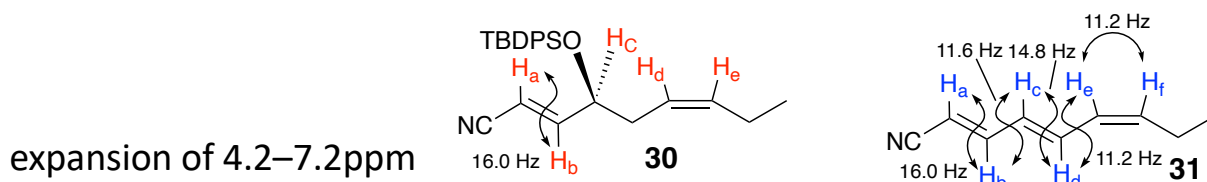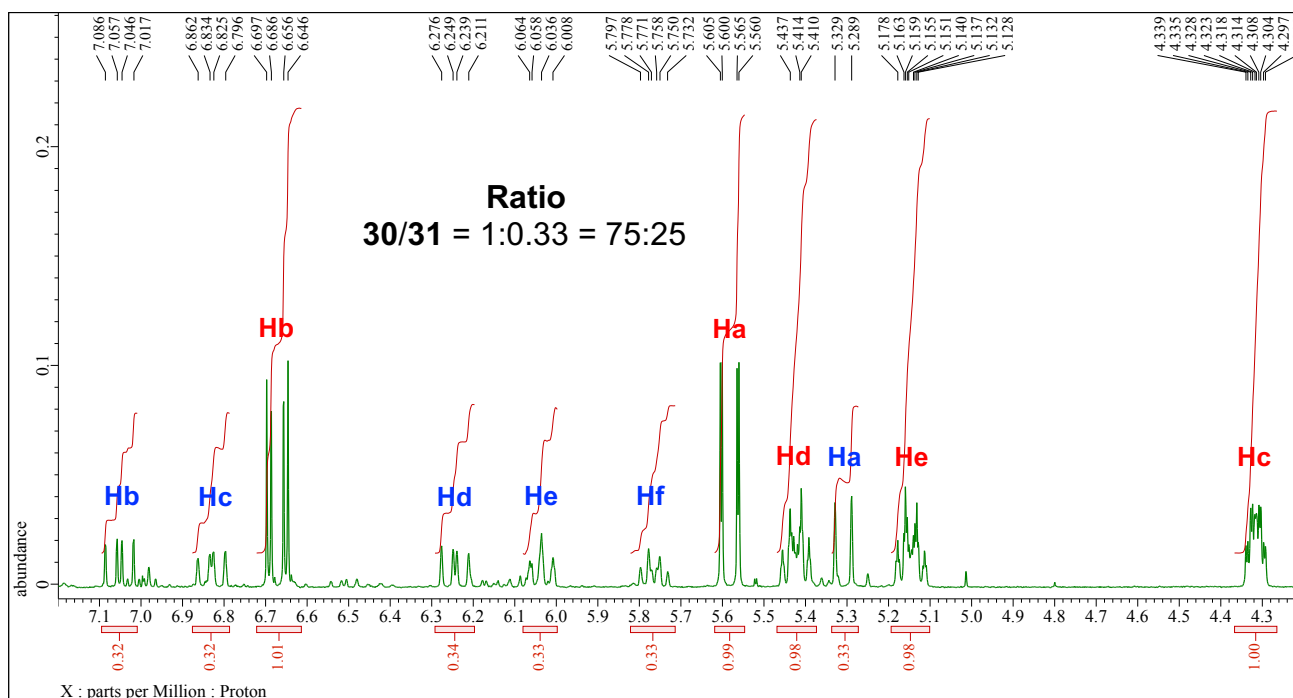

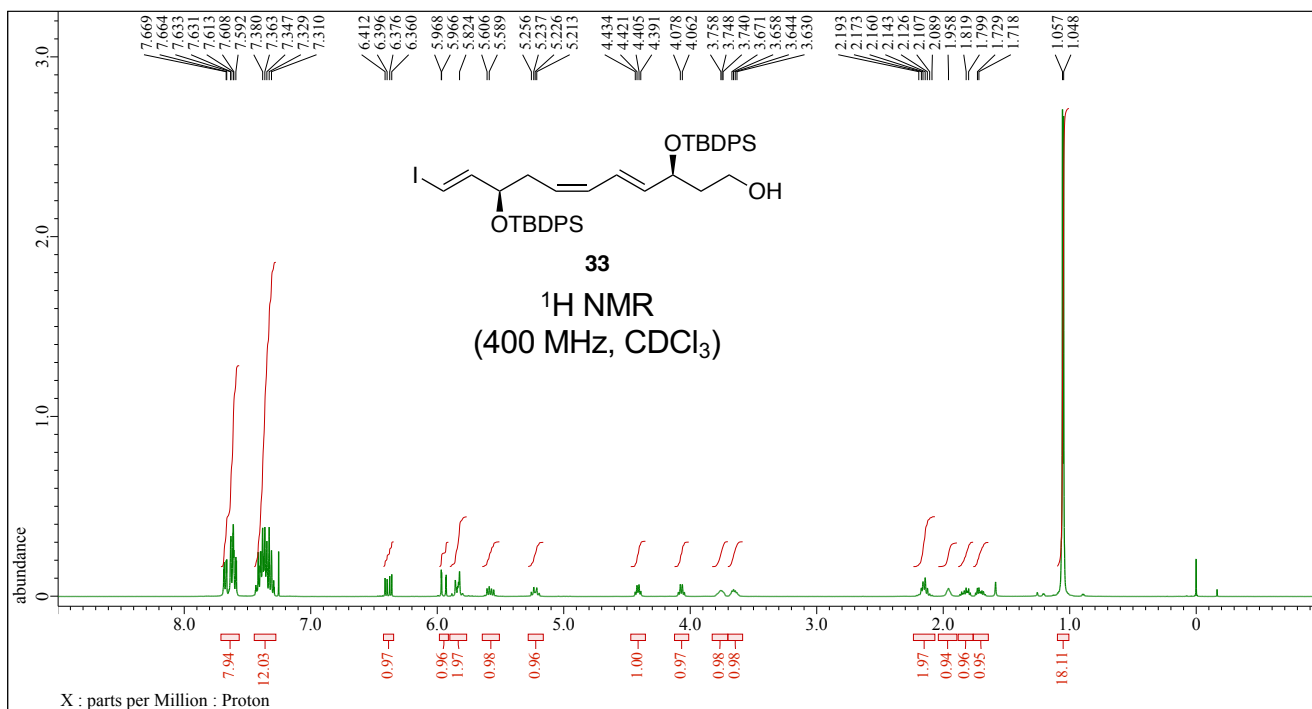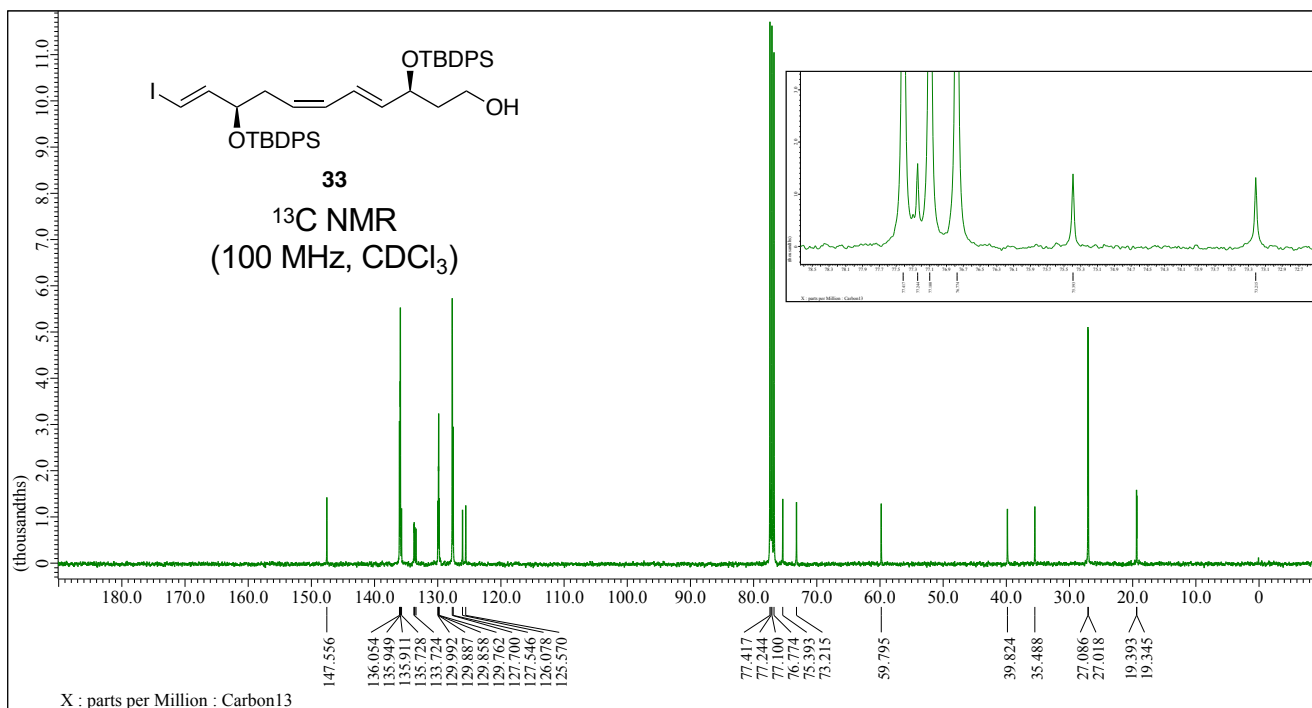



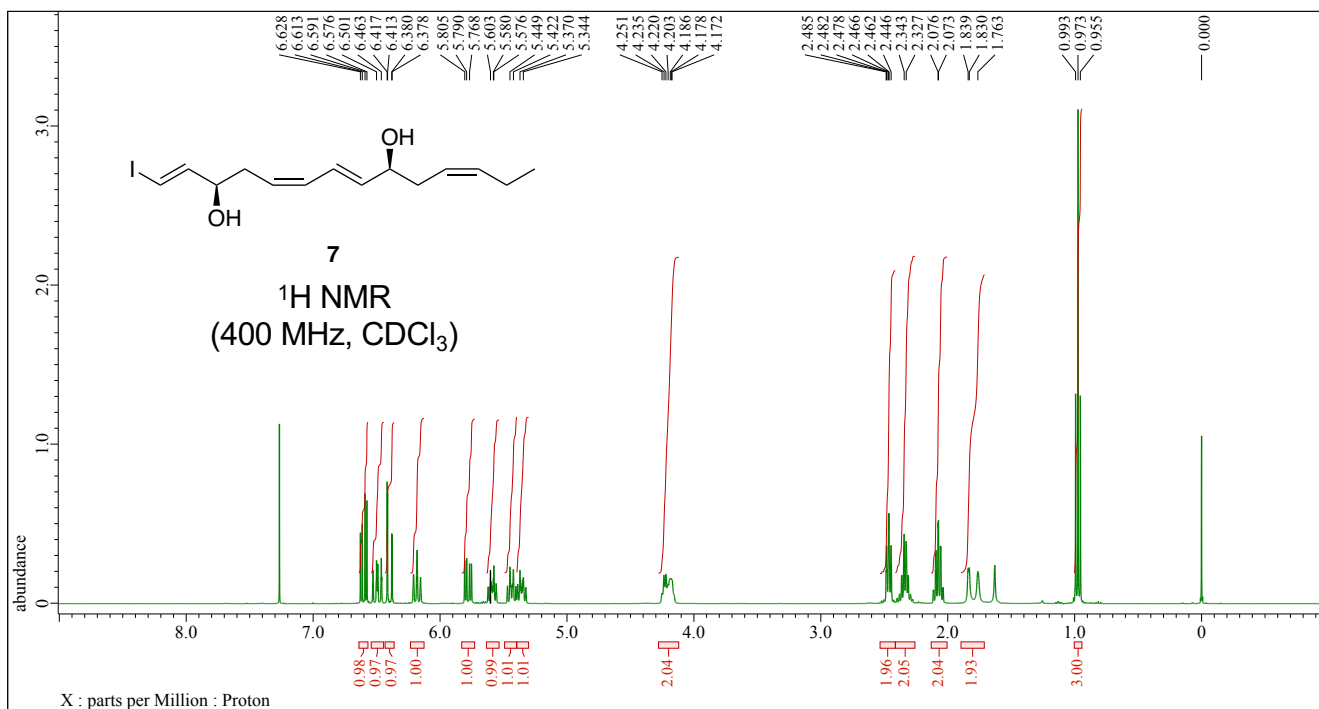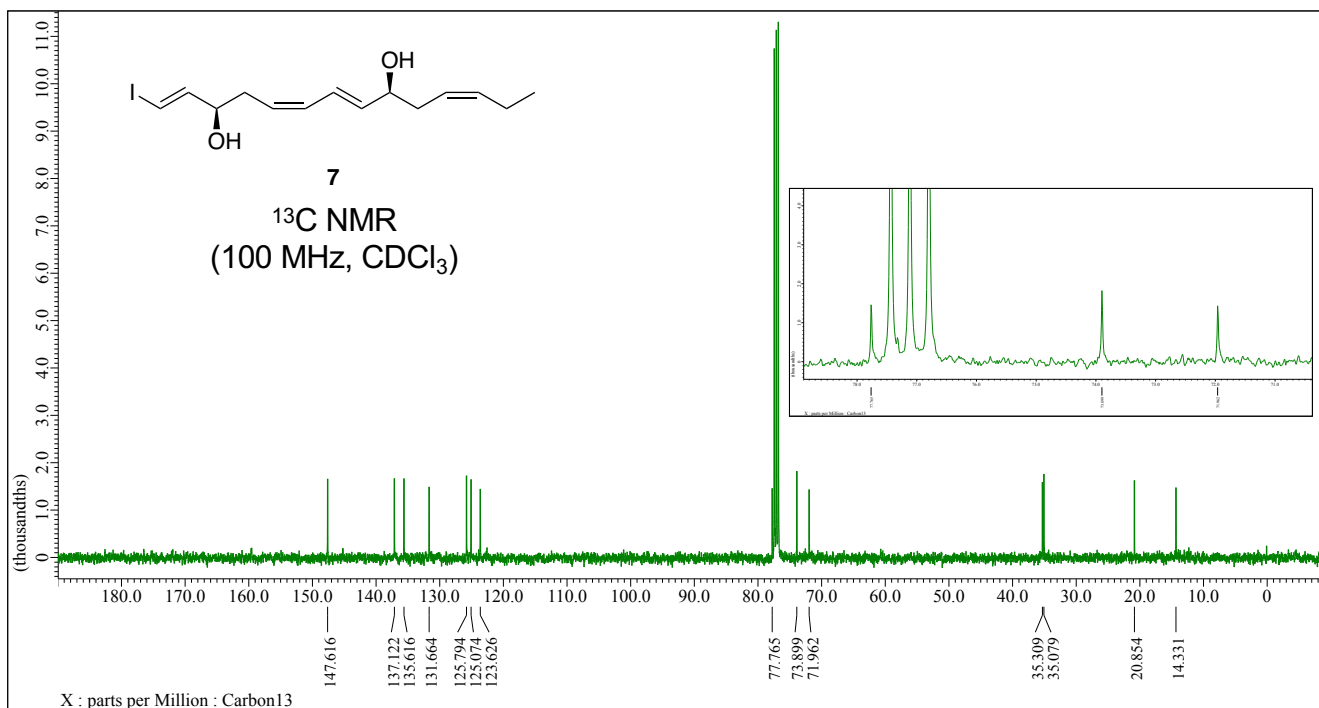

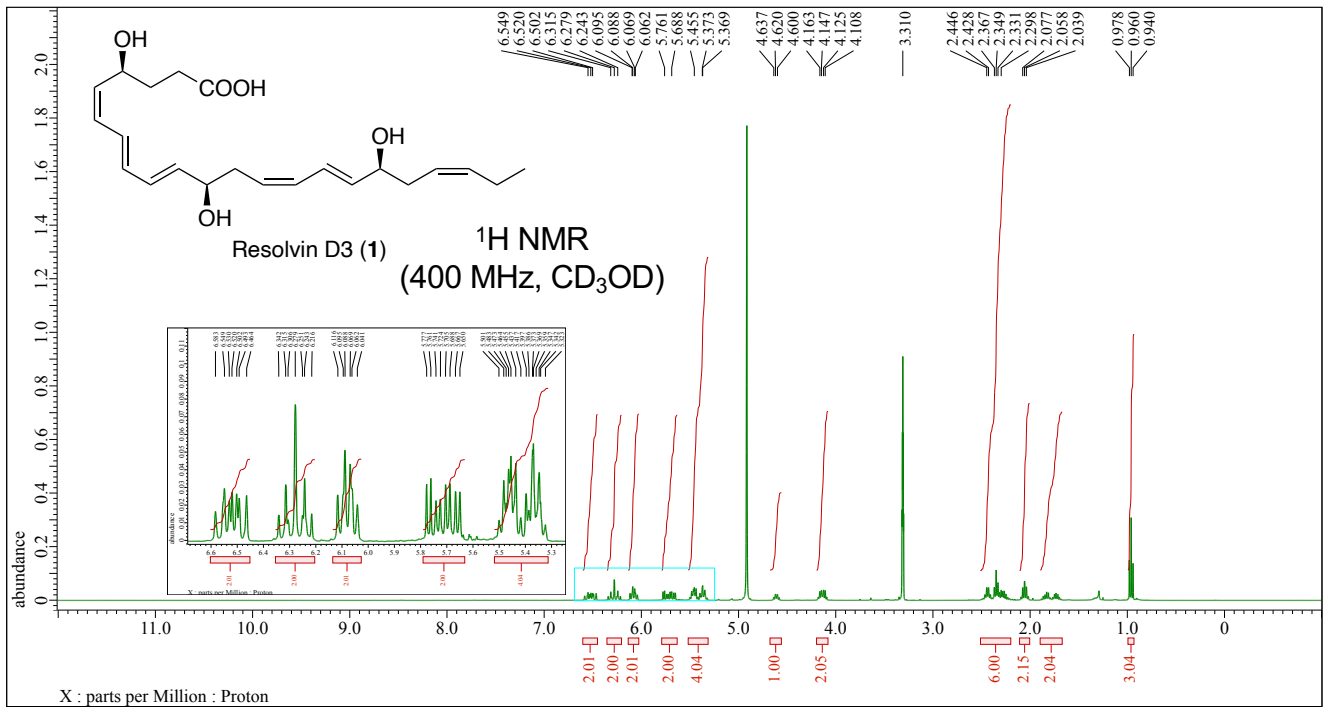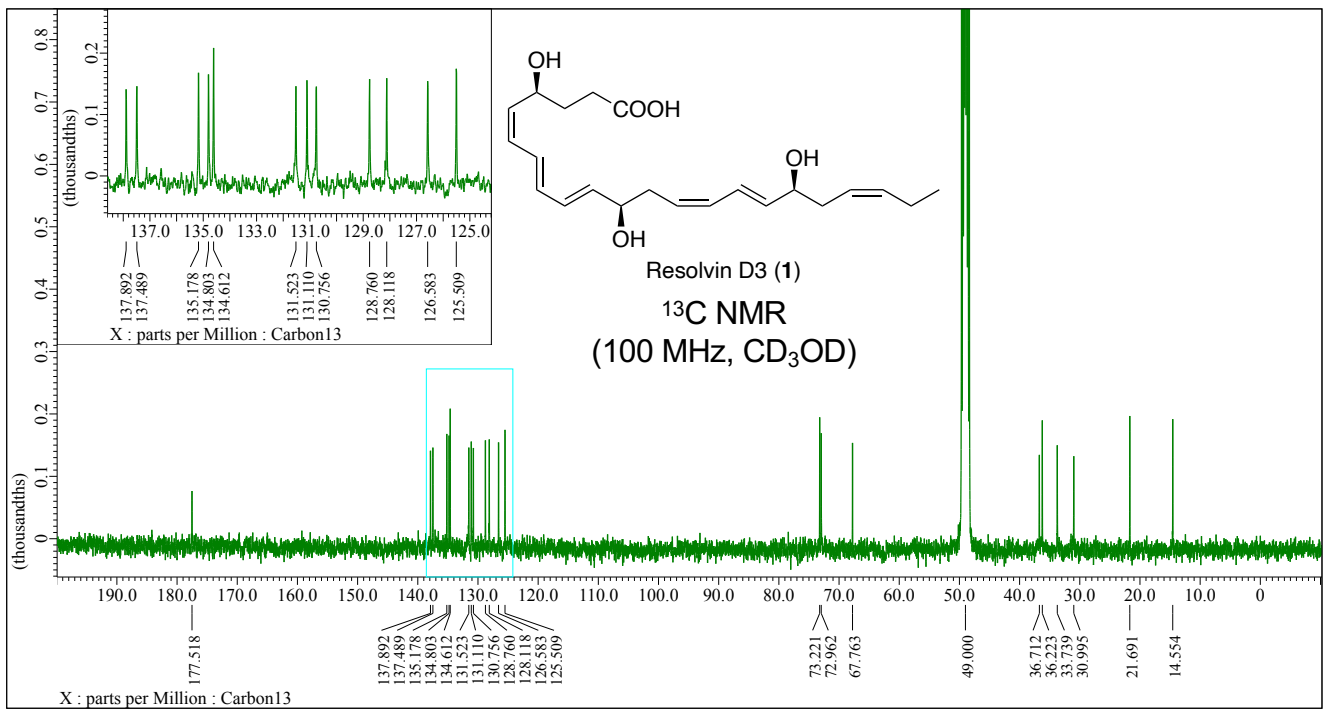

## UV spectrum of resolvin D3 (MeOH)

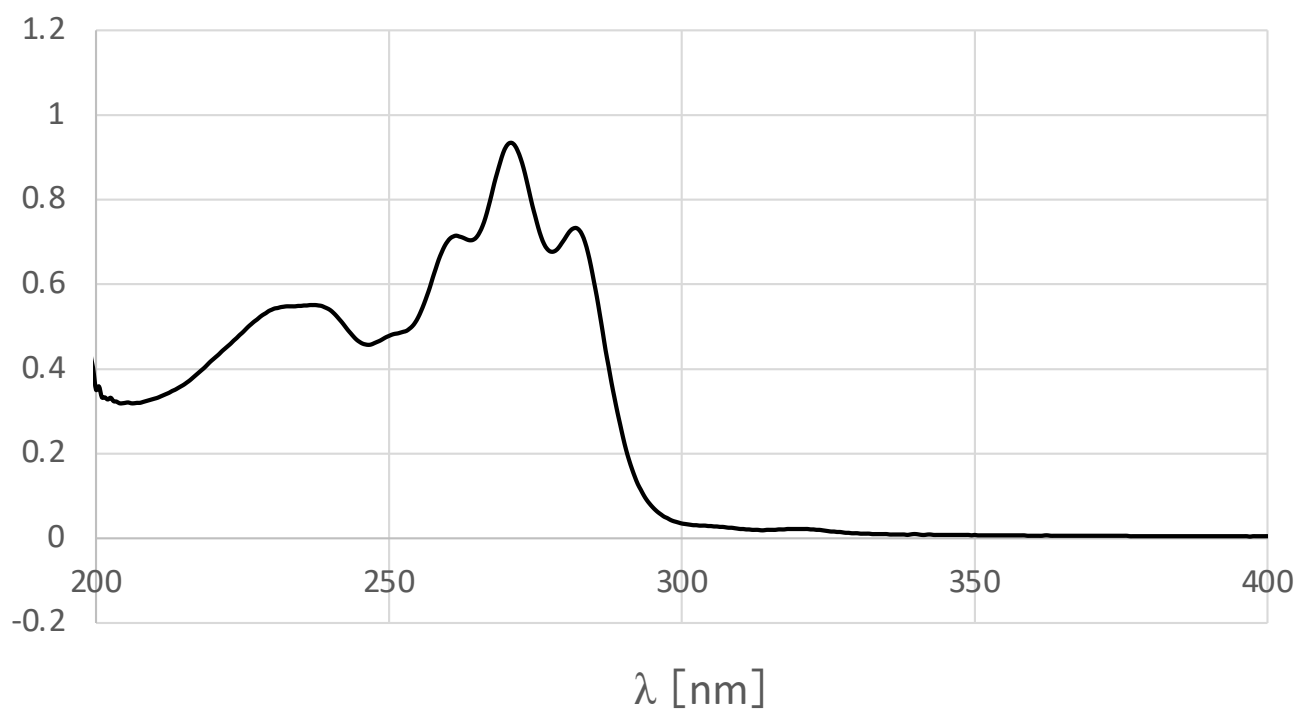

Supplement: d2ob00750a1.pdf [file d2ob00750a1.pdf]
